# Supplementary material
Source: Research Square preprint supplement (doi:10.21203/rs.3.rs-9929003/v1)

bacterized 9 weeks

*shoot-residuals*

*root-residuals*

*Left-up*

*Right*

*Left-down*

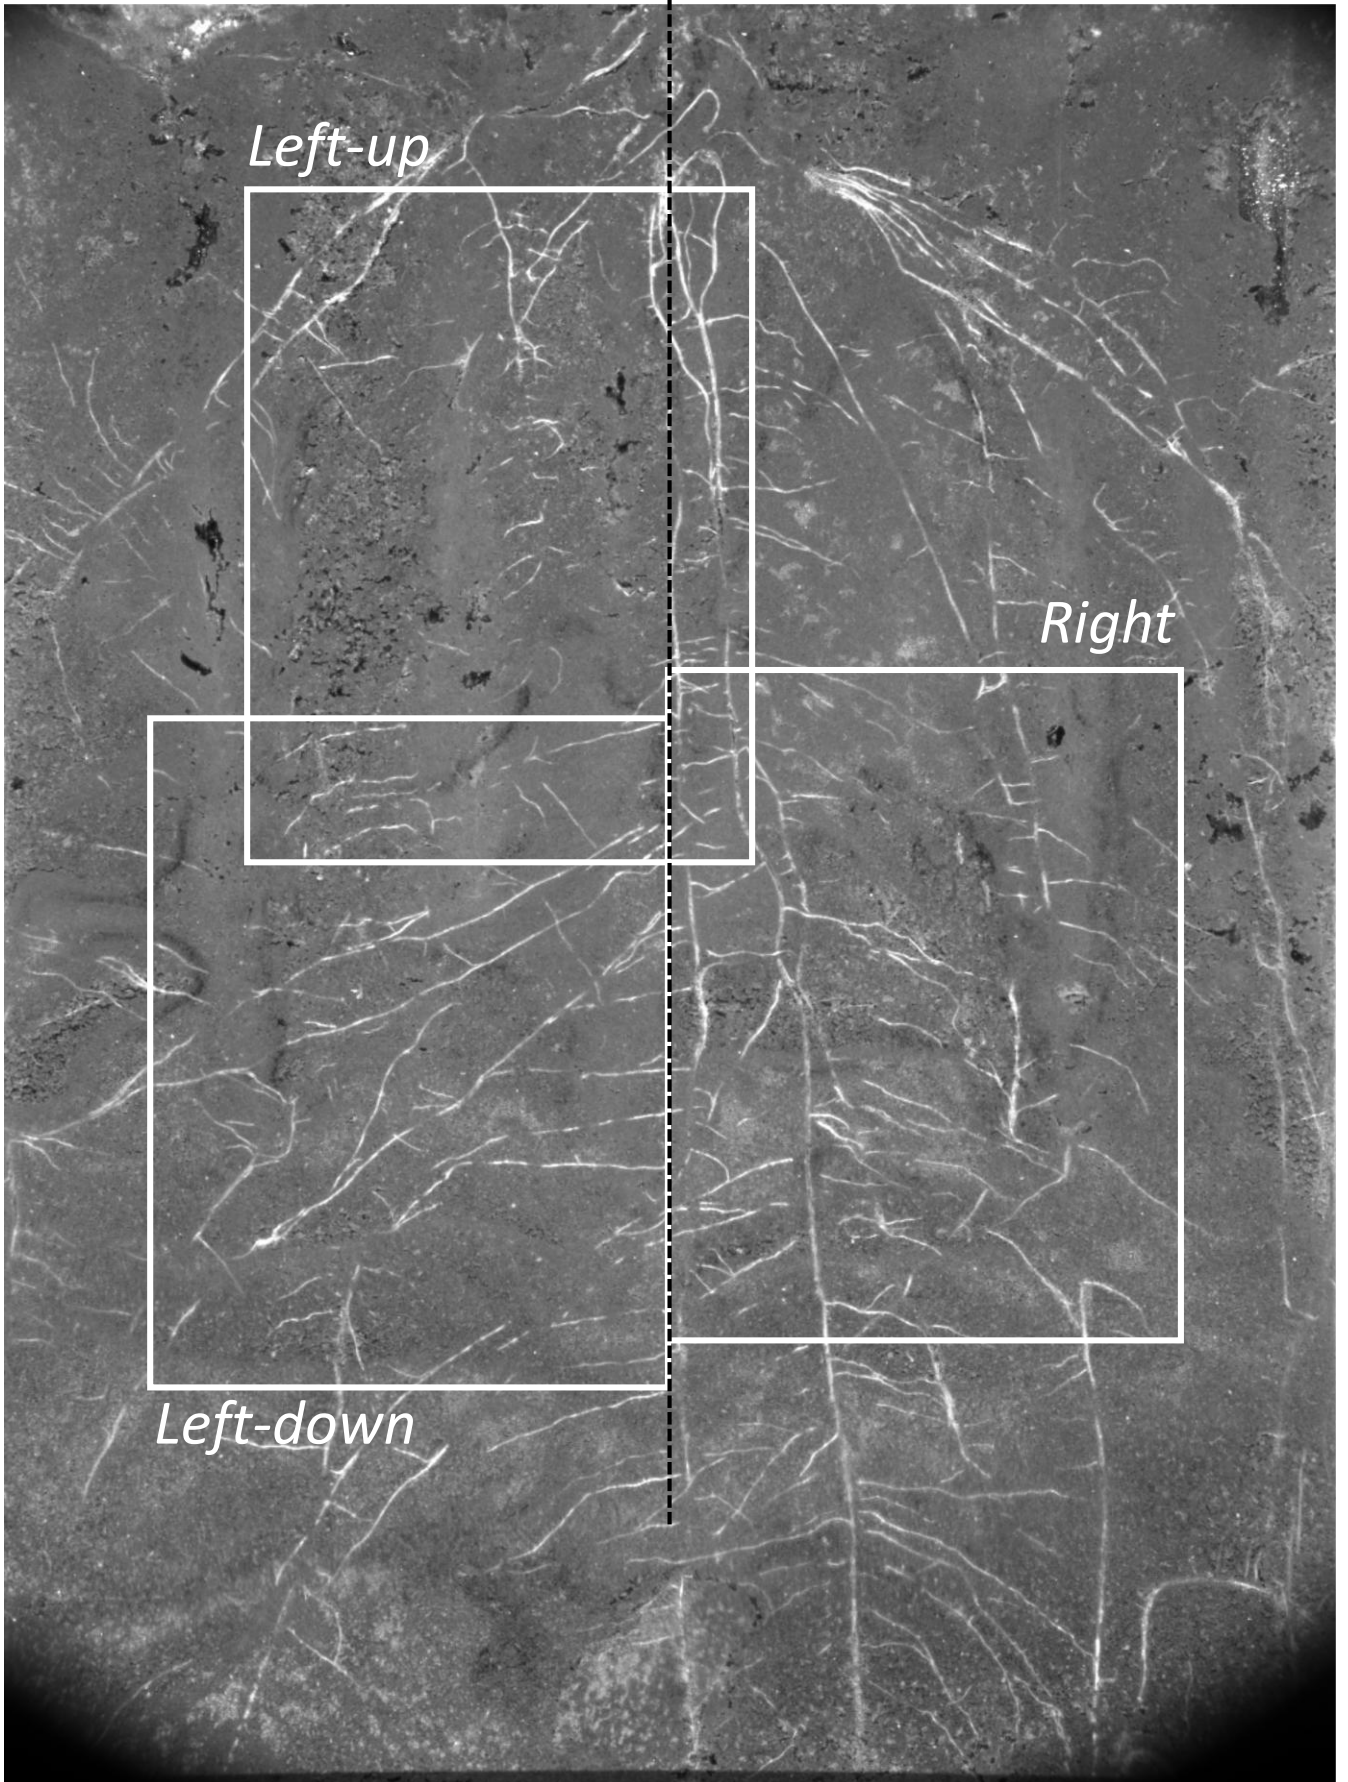

bacterized 9 weeks

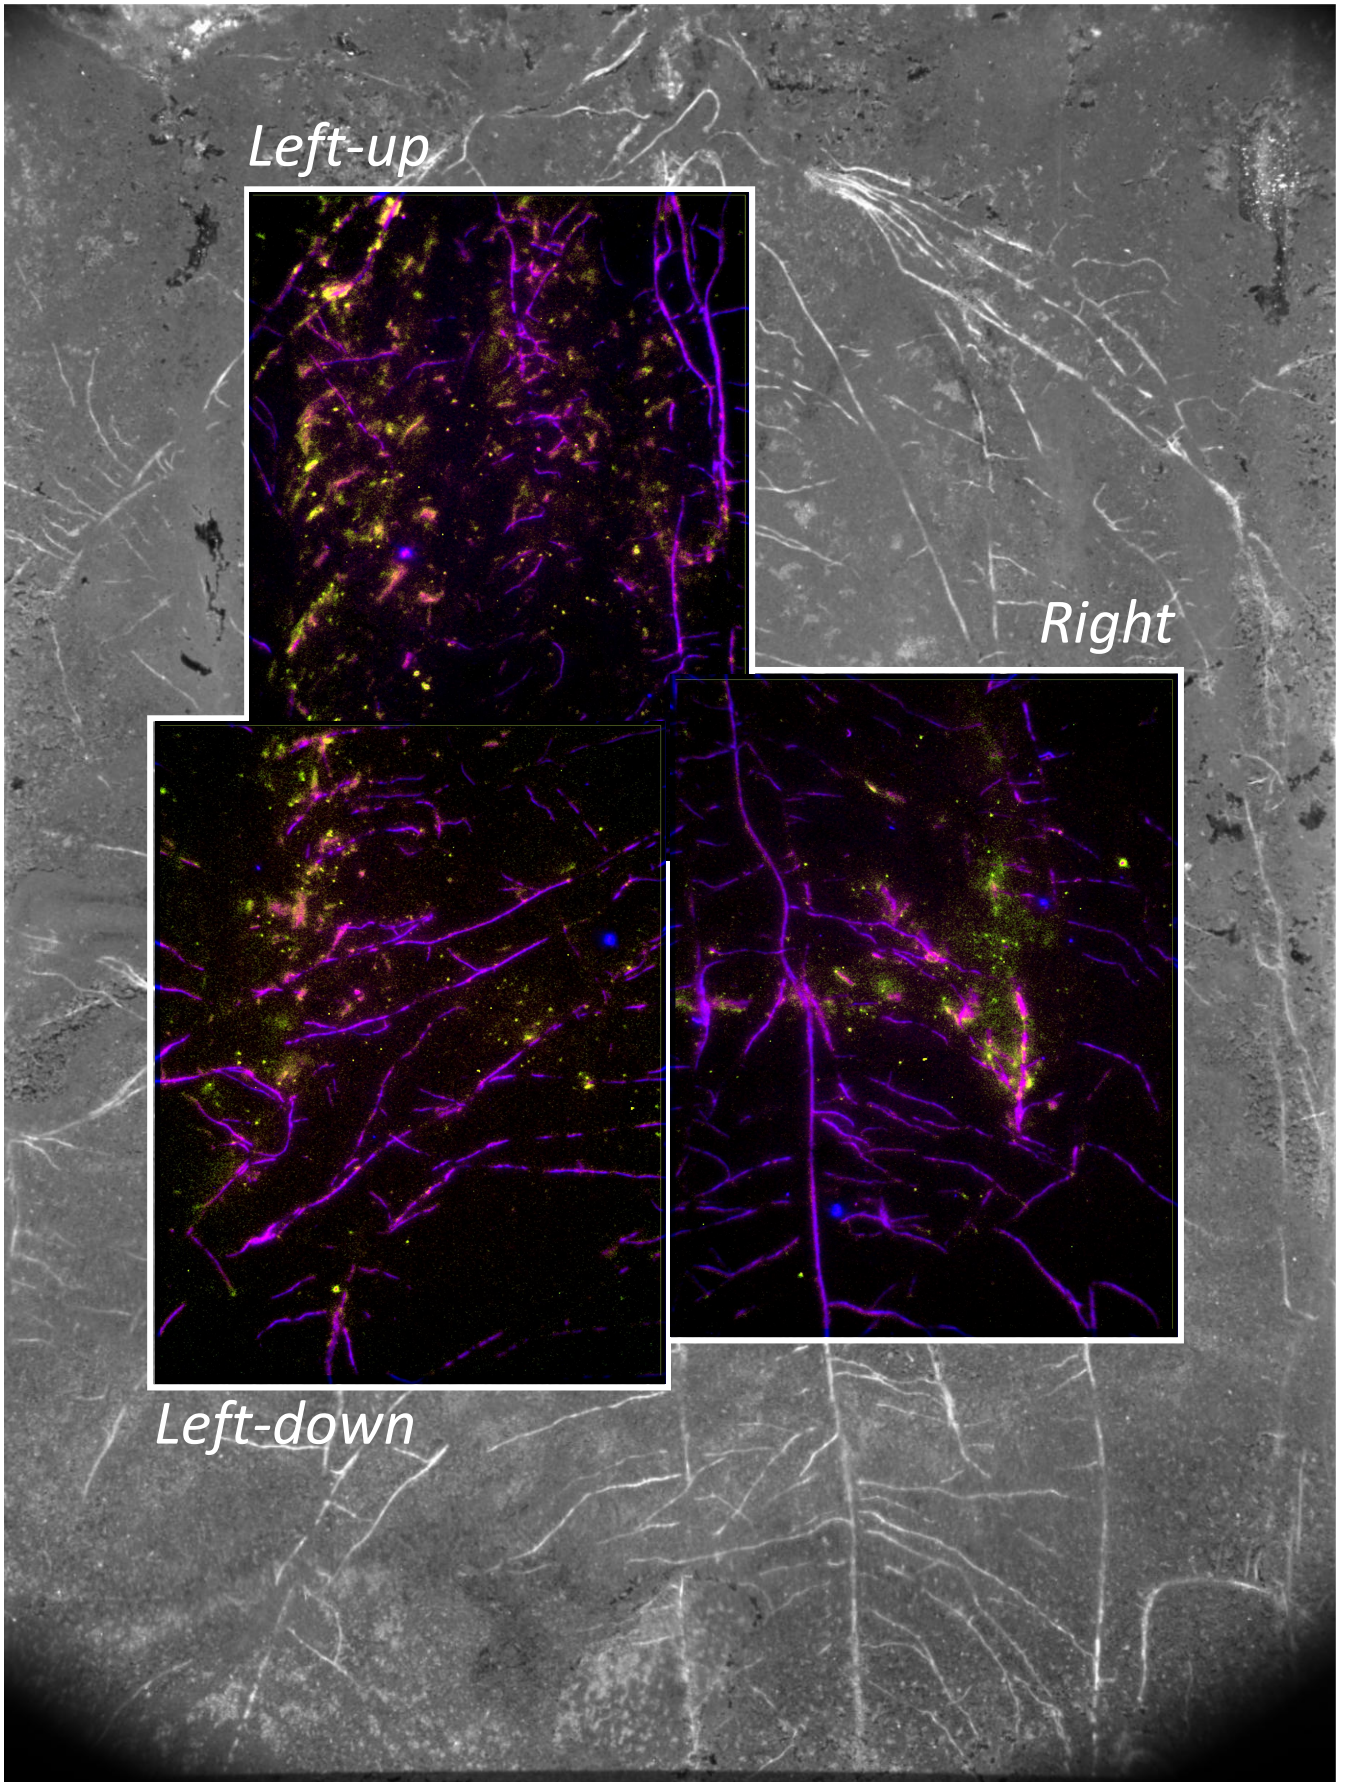

**Bacterized shoot-residuals**  
**Left-up RR**

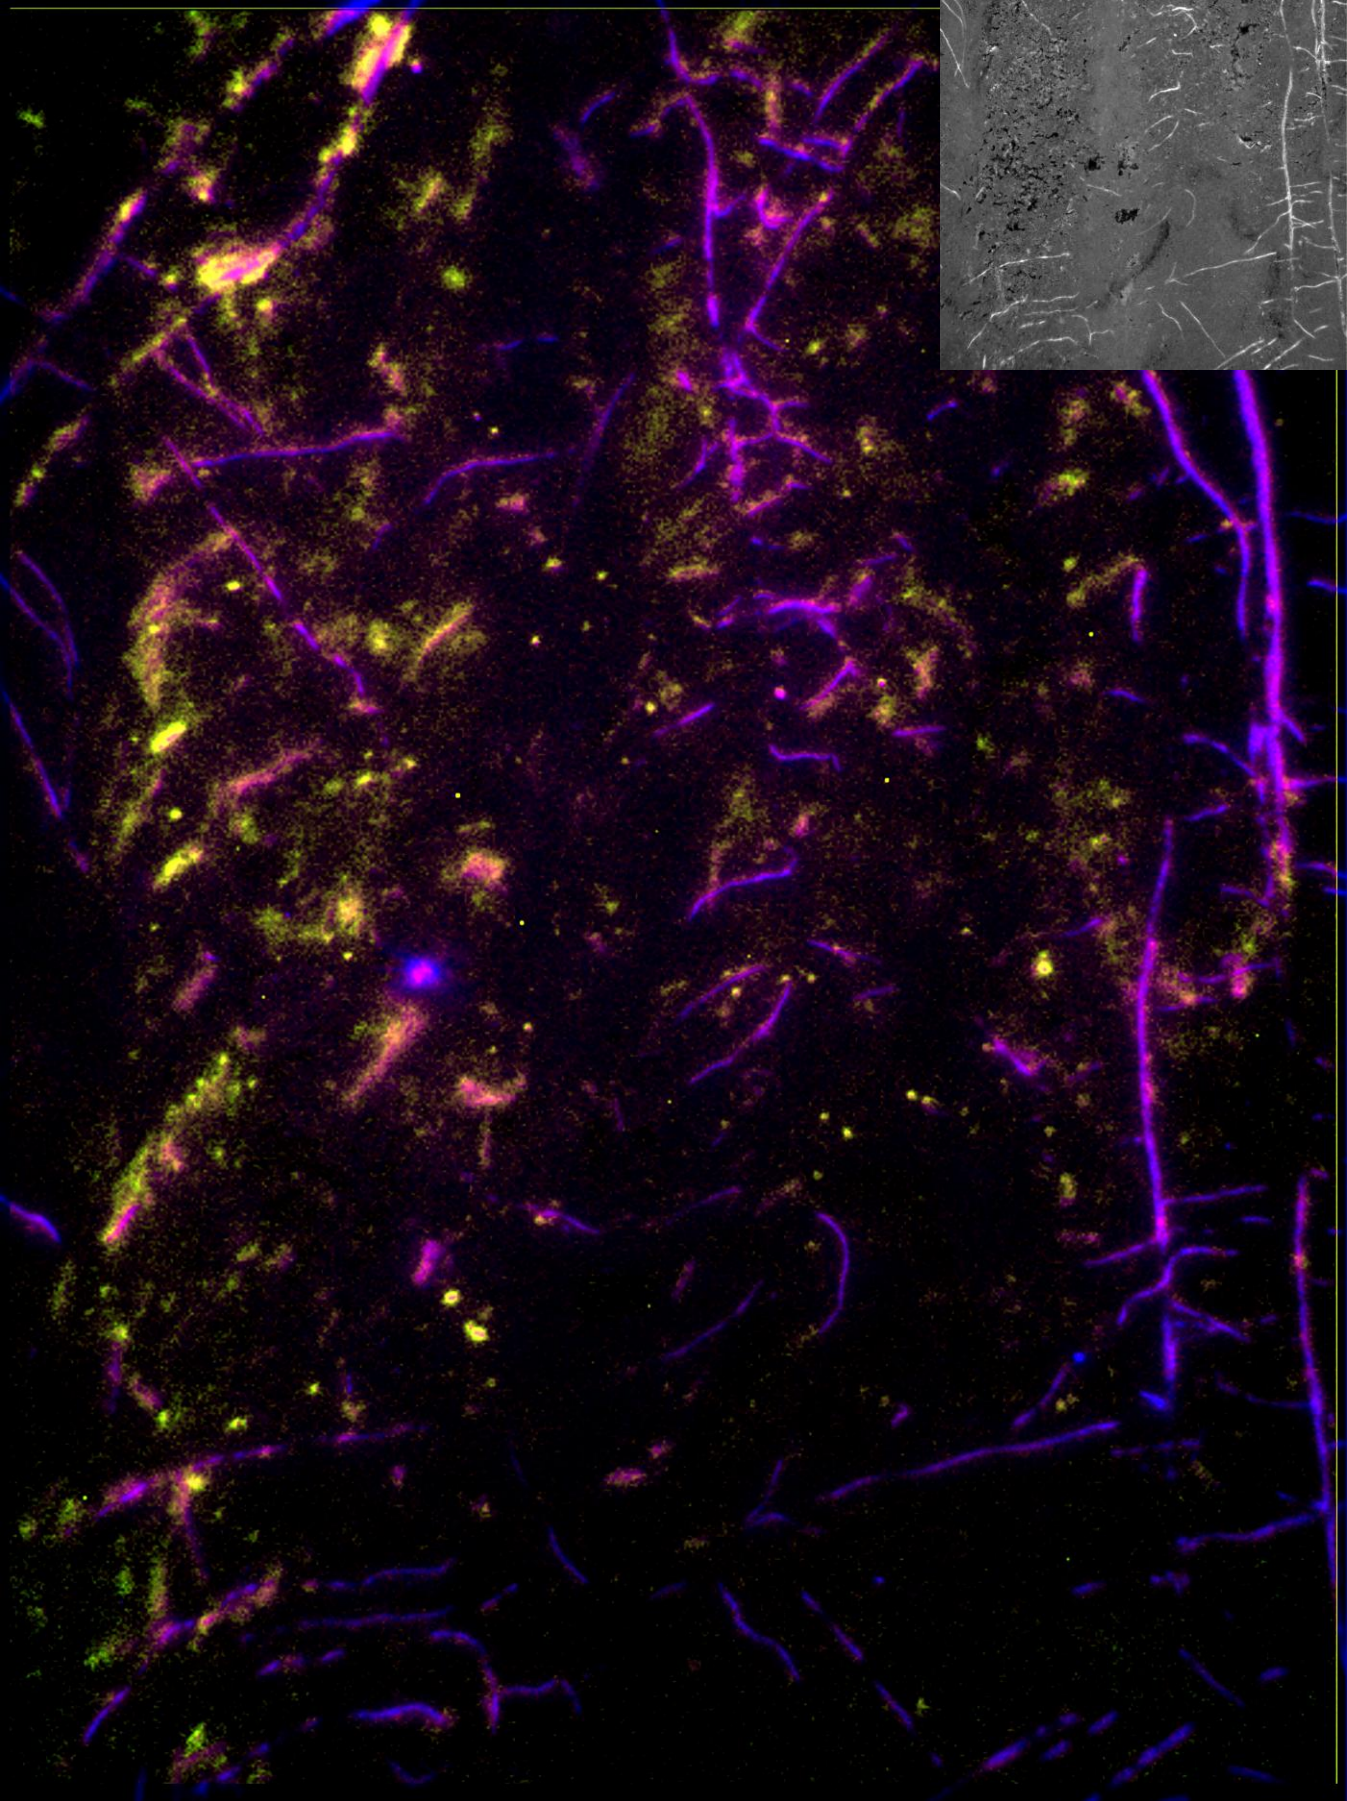

**Bacterized shoot-residuals**  
**Left-down**

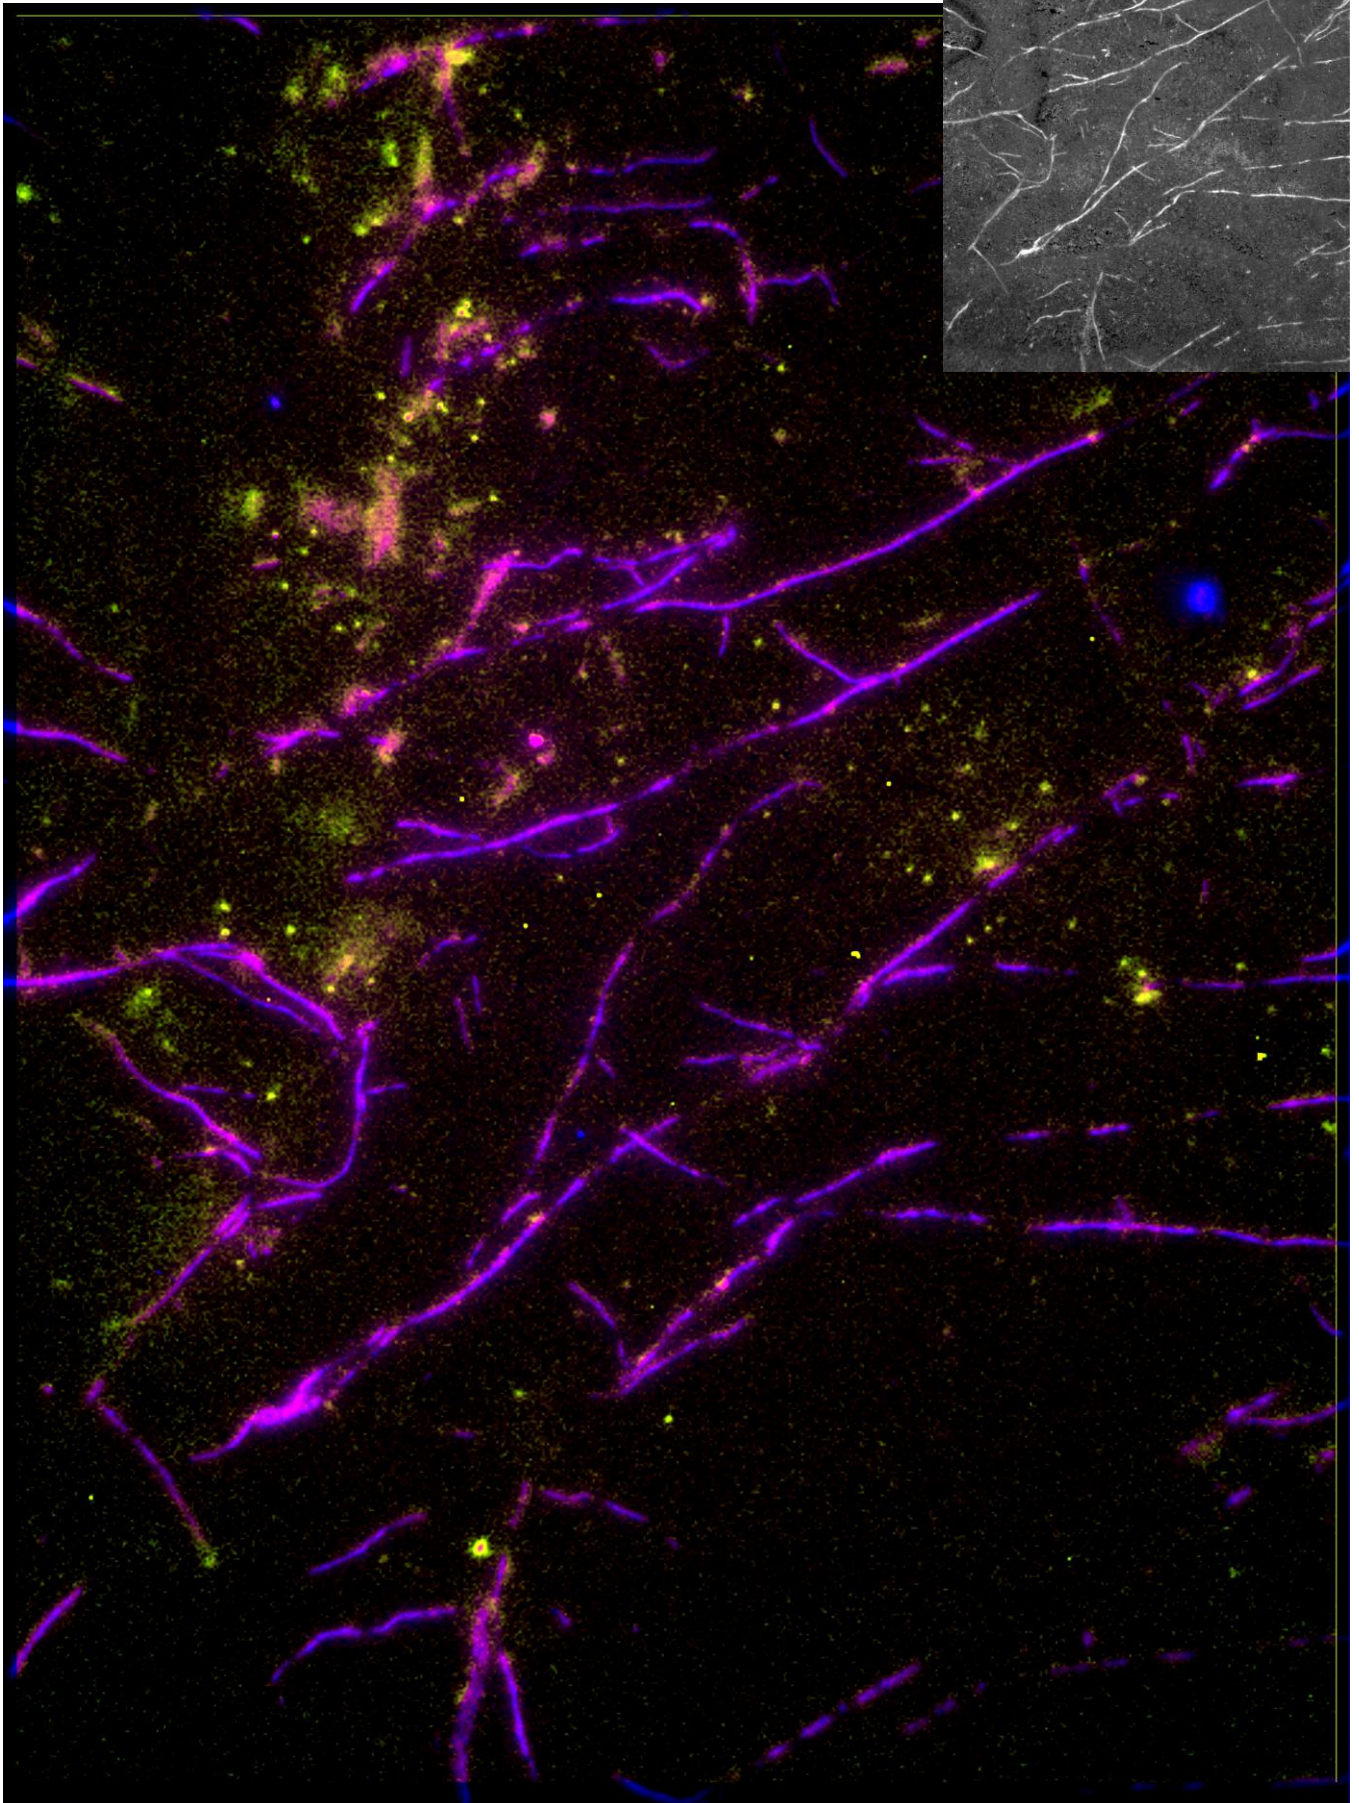

**Bacterized root-residuals**  
**Right**

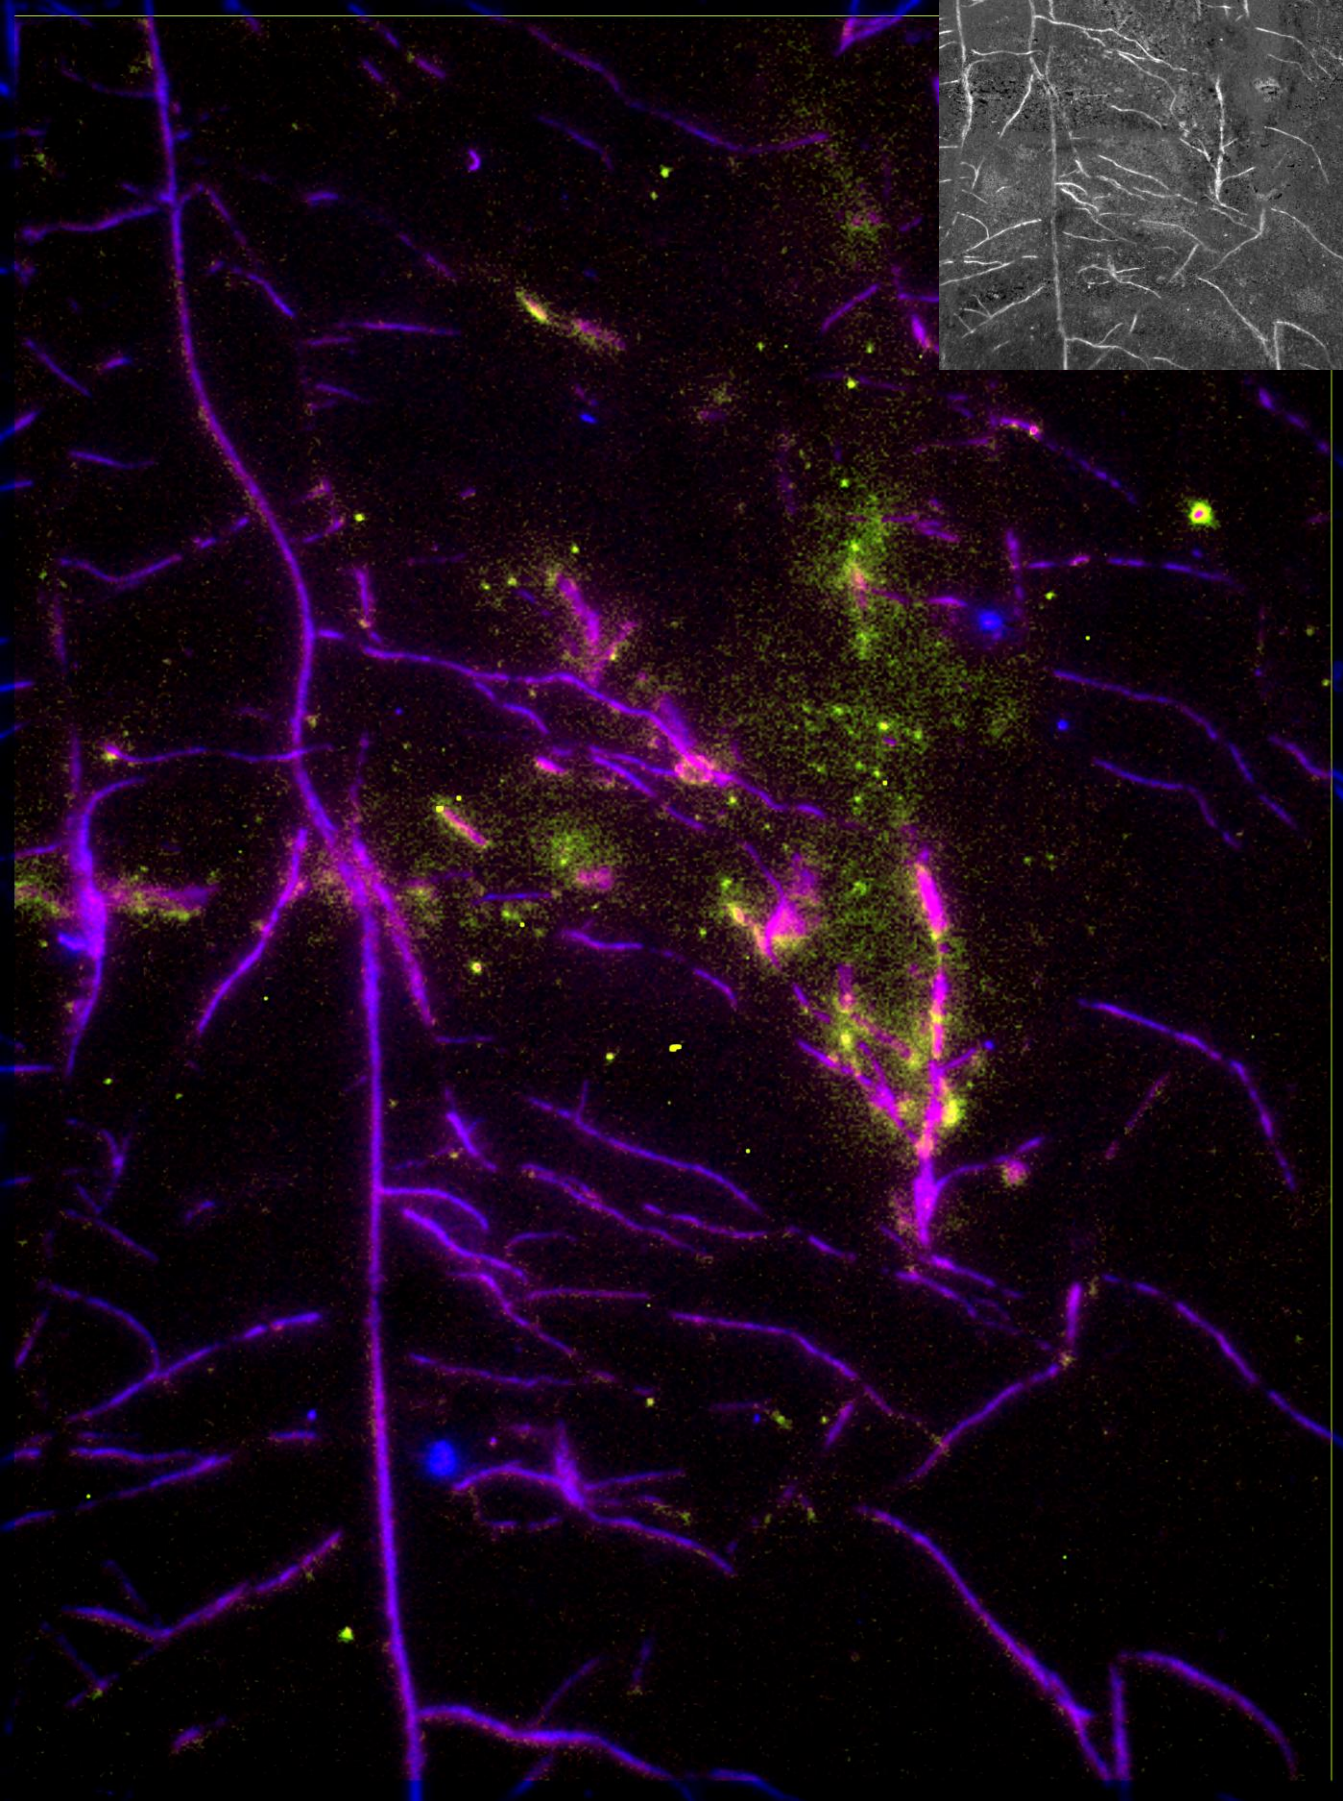

## Session\_II

bacterized 9 weeks

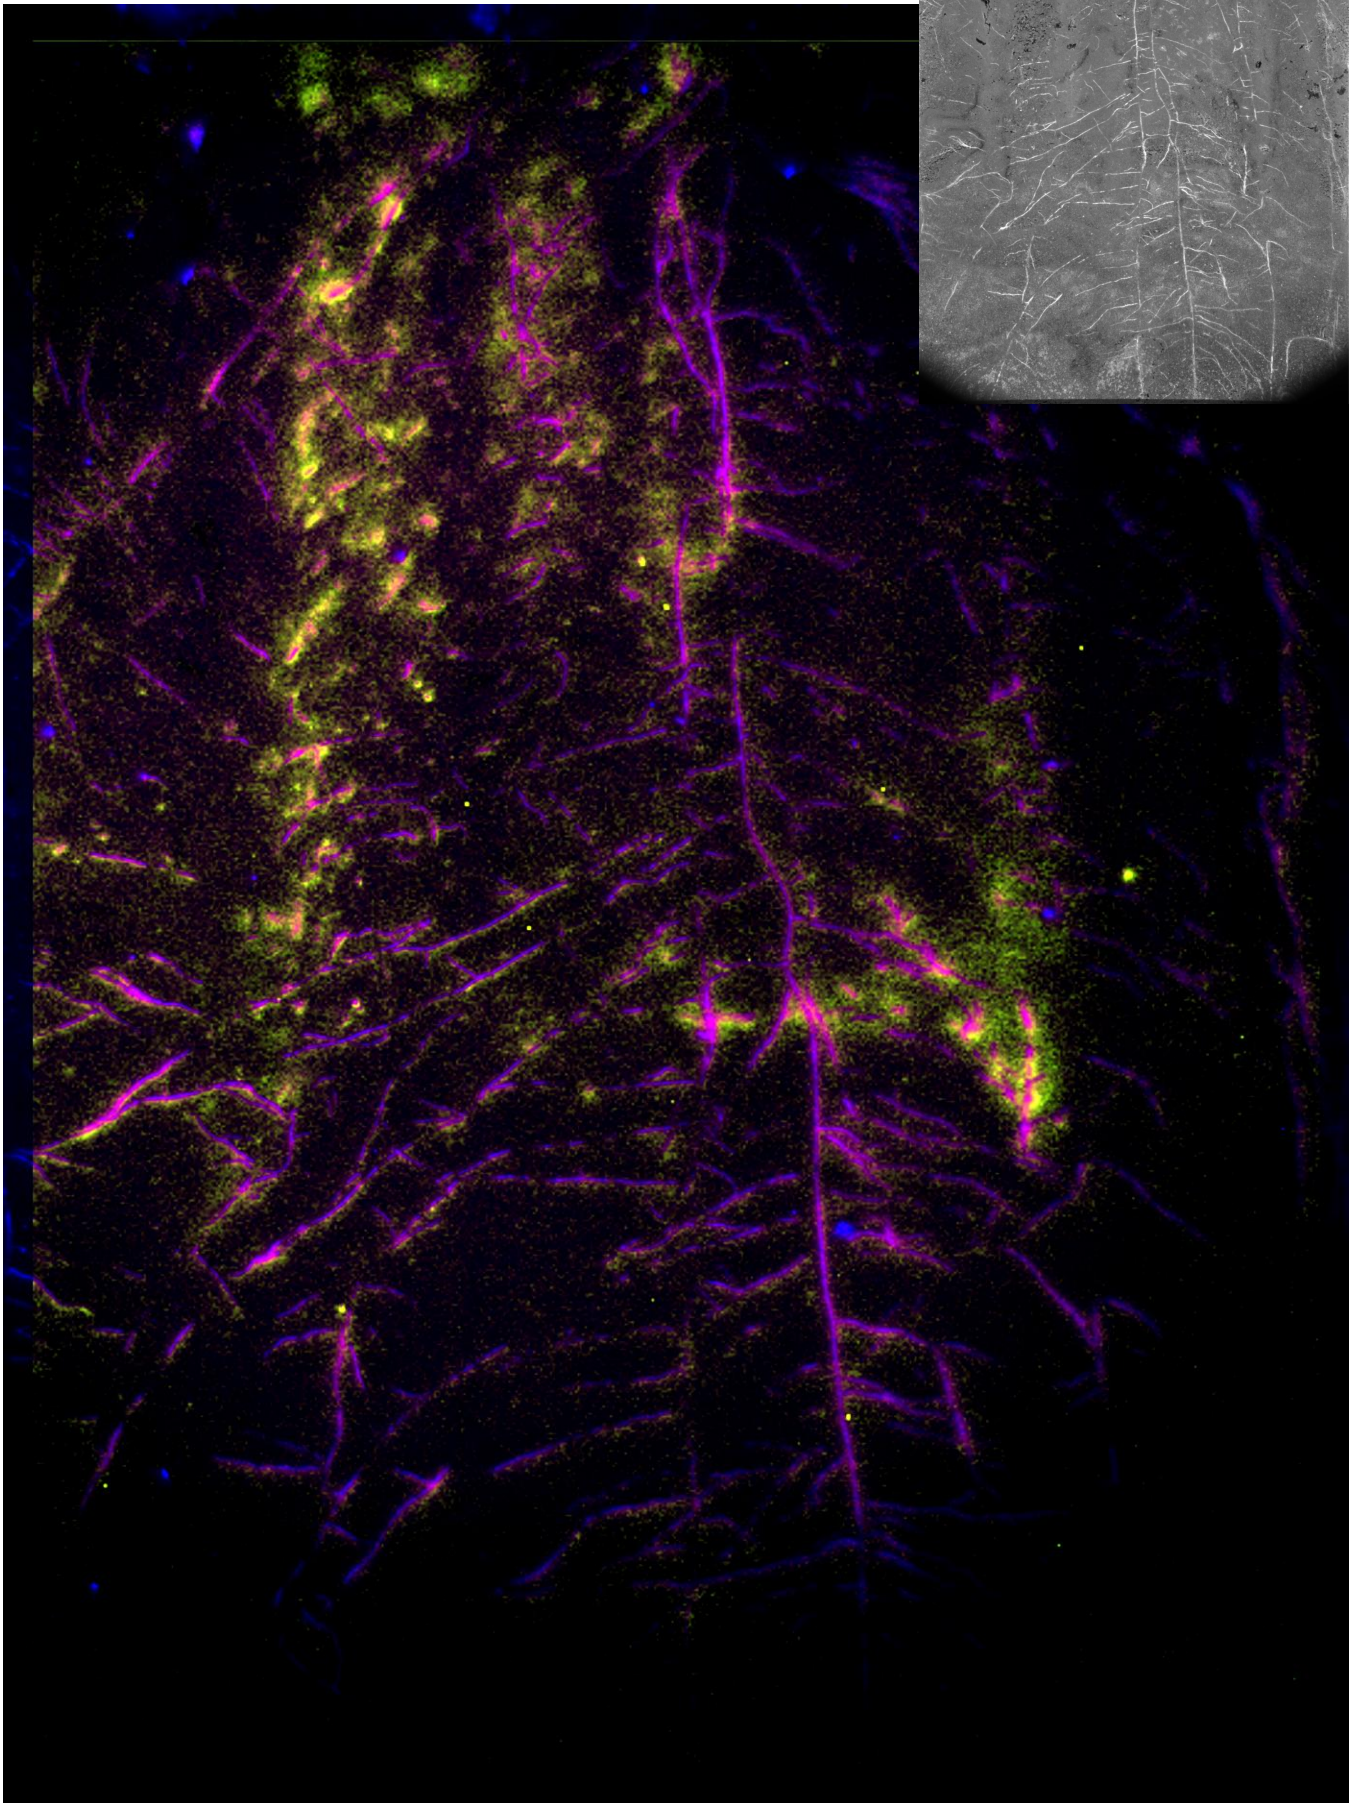

Supplement: Supplementary file 1 [file 26e52fd4d492f968b5cb5238.pdf]
