# Supplementary material
Source: Research Square preprint supplement (doi:10.21203/rs.3.rs-9929003/v1)

**Session\_I**  
bacterized 3 weeks

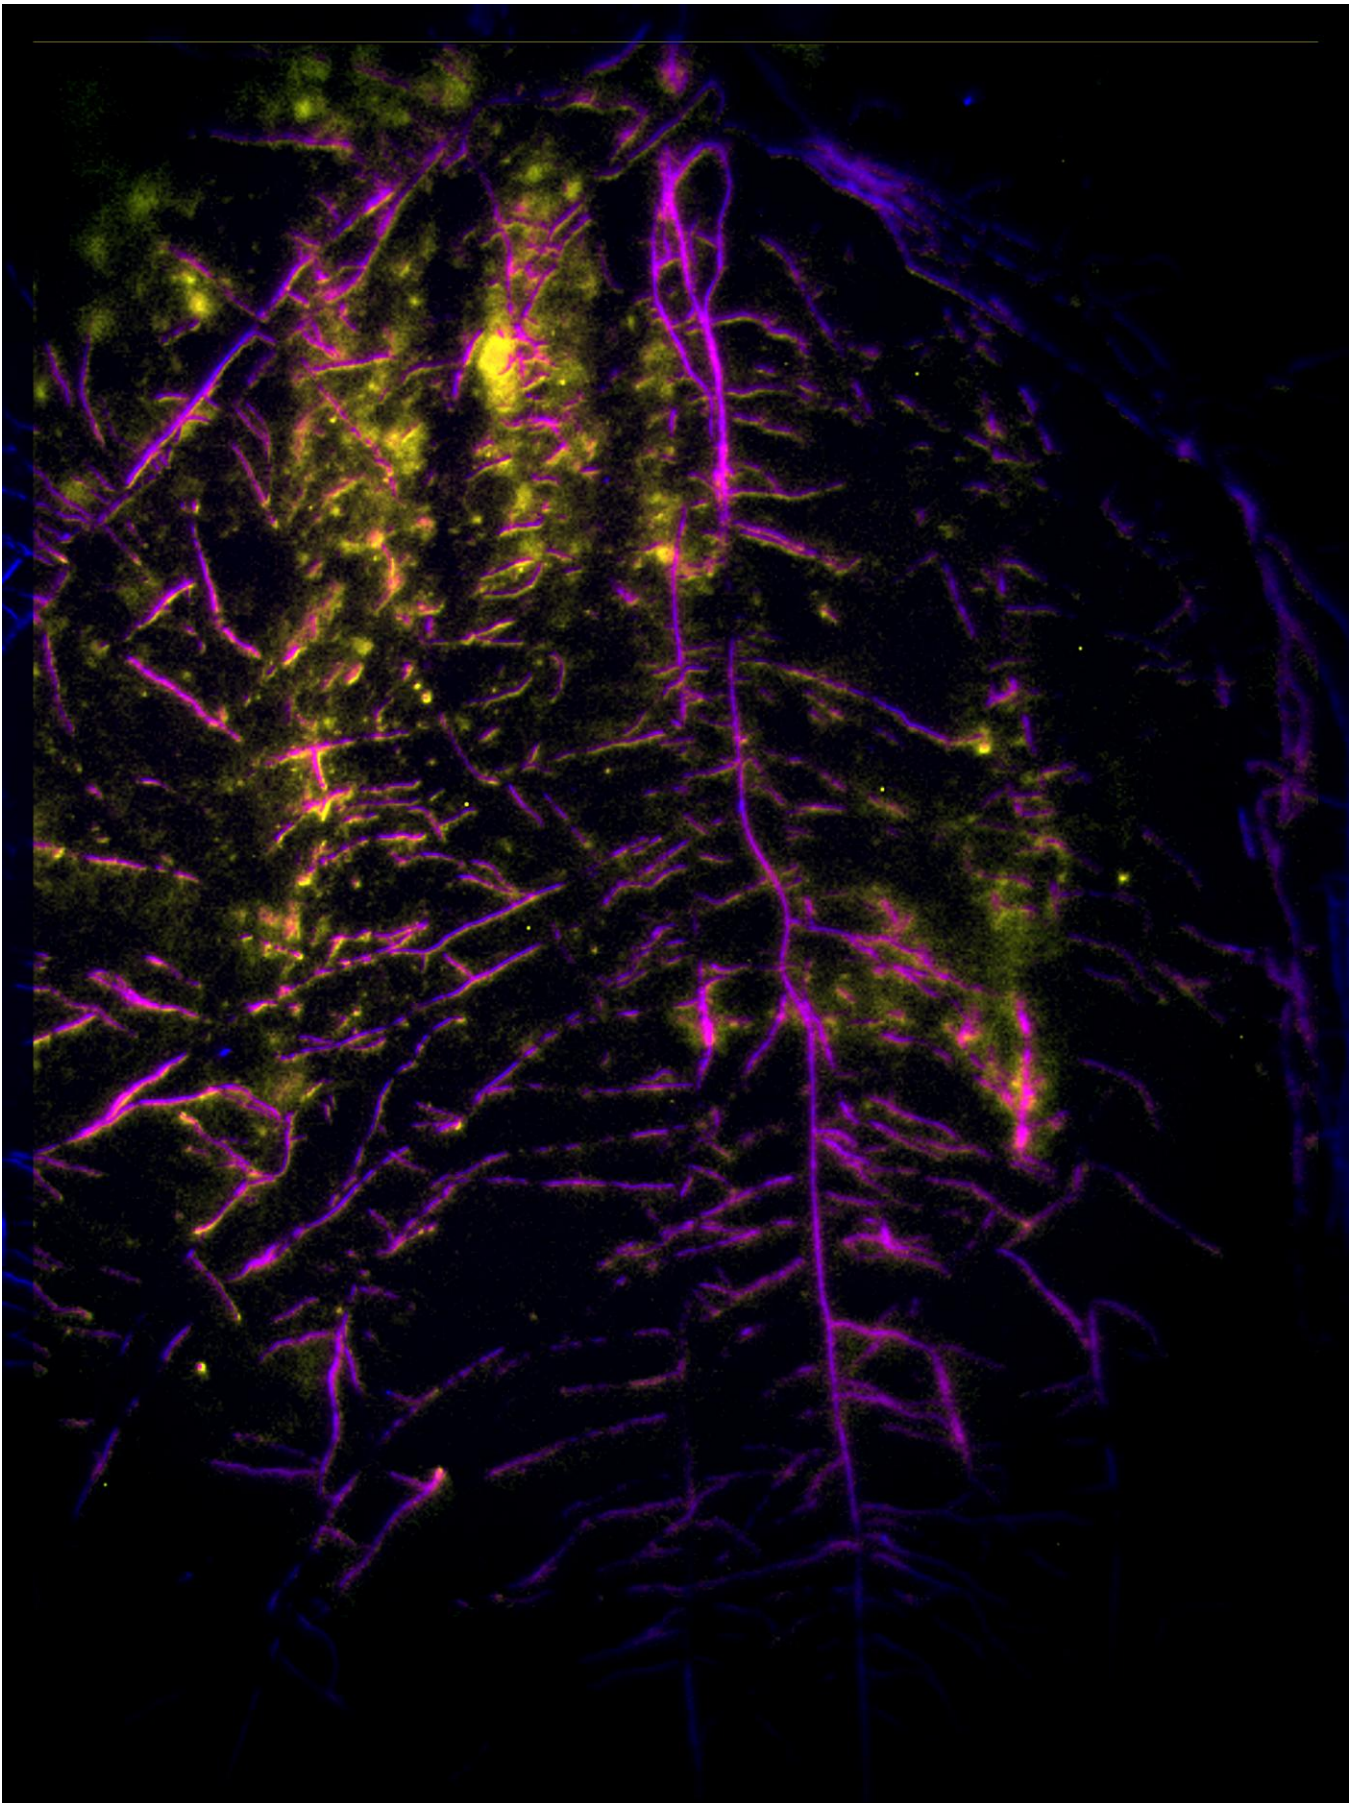

**Session\_I**  
bacterized 4 weeks

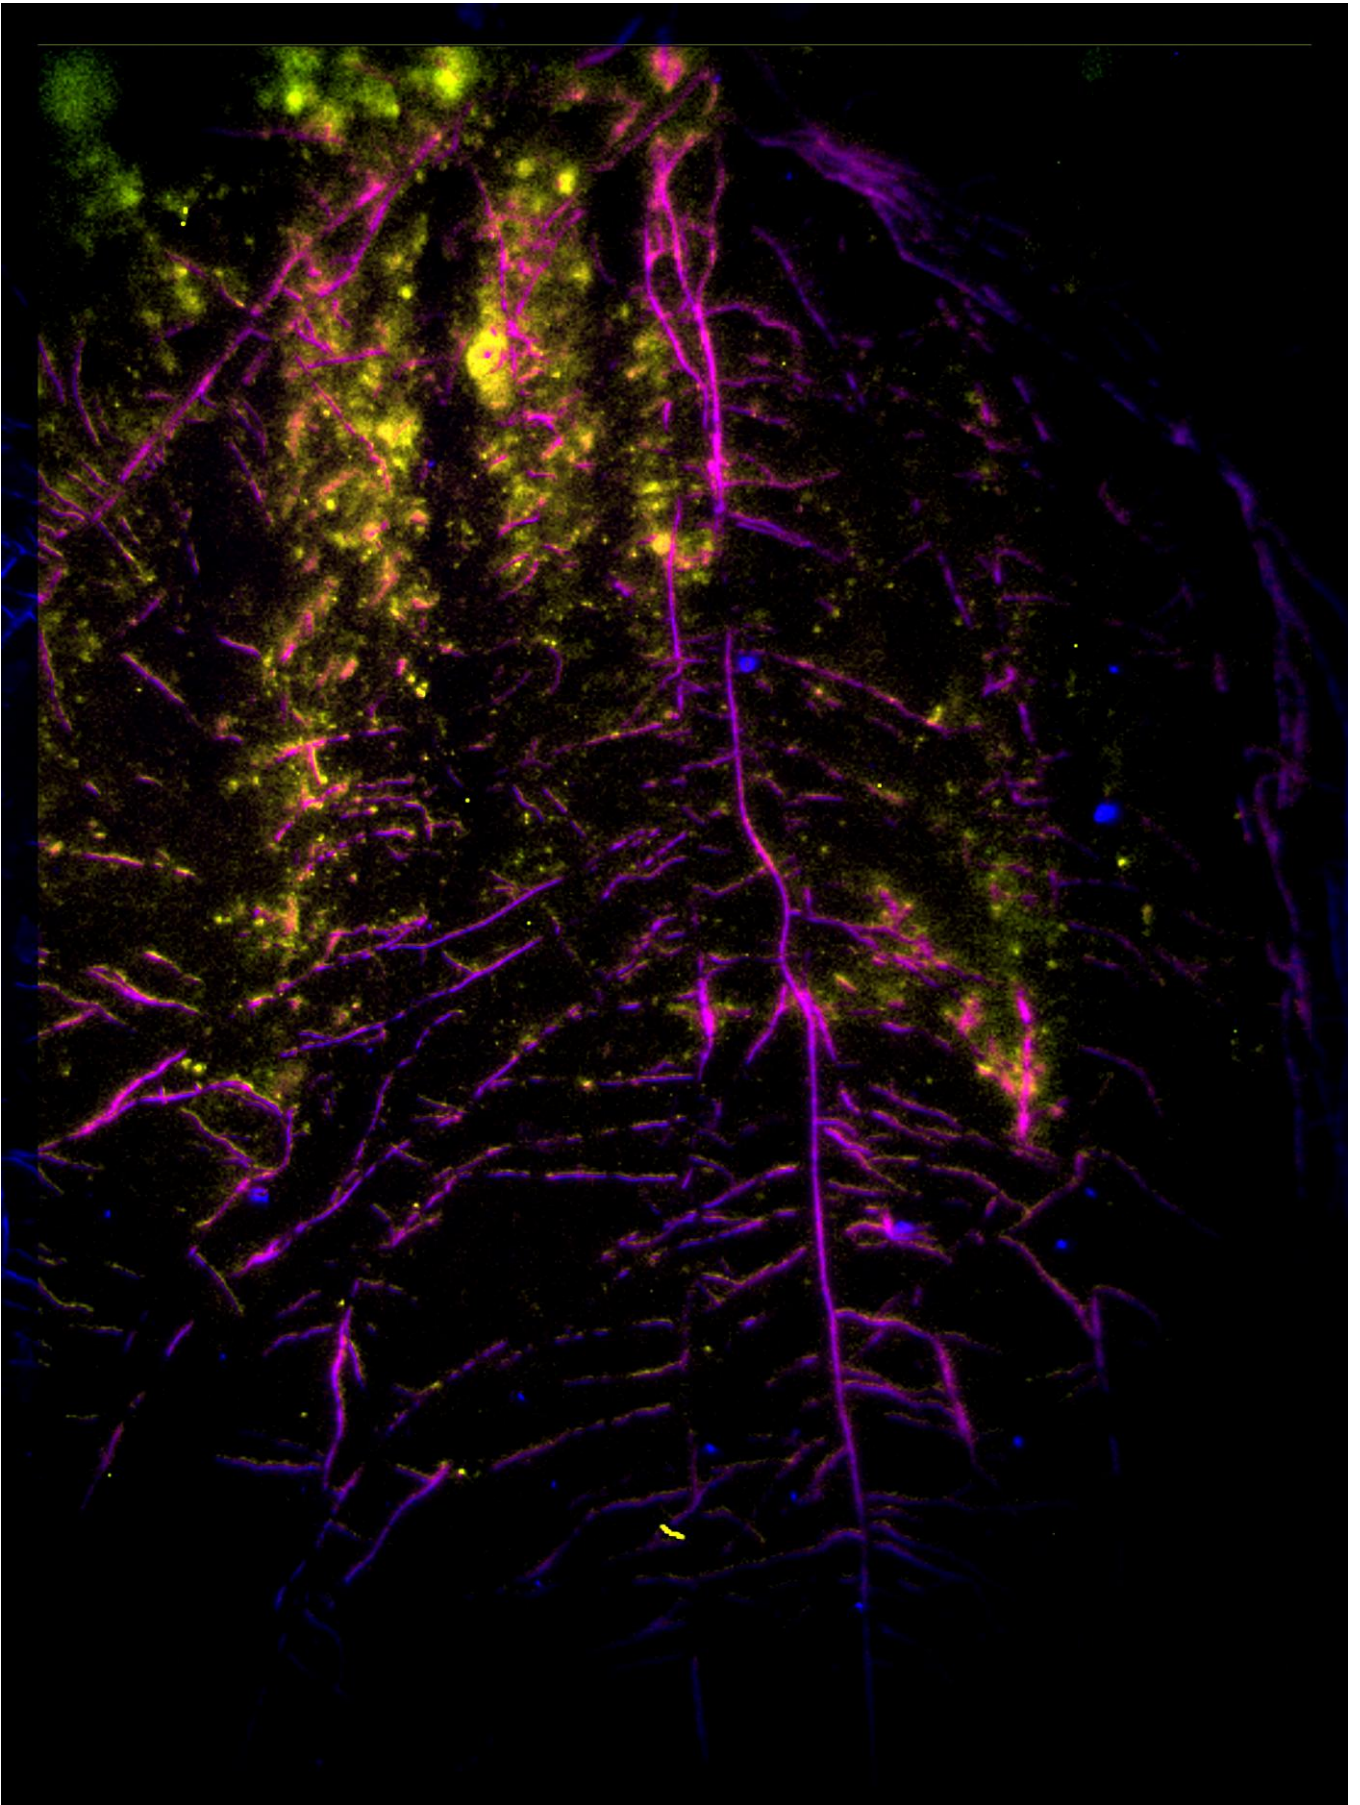

**Session\_II**  
bacterized 9 weeks

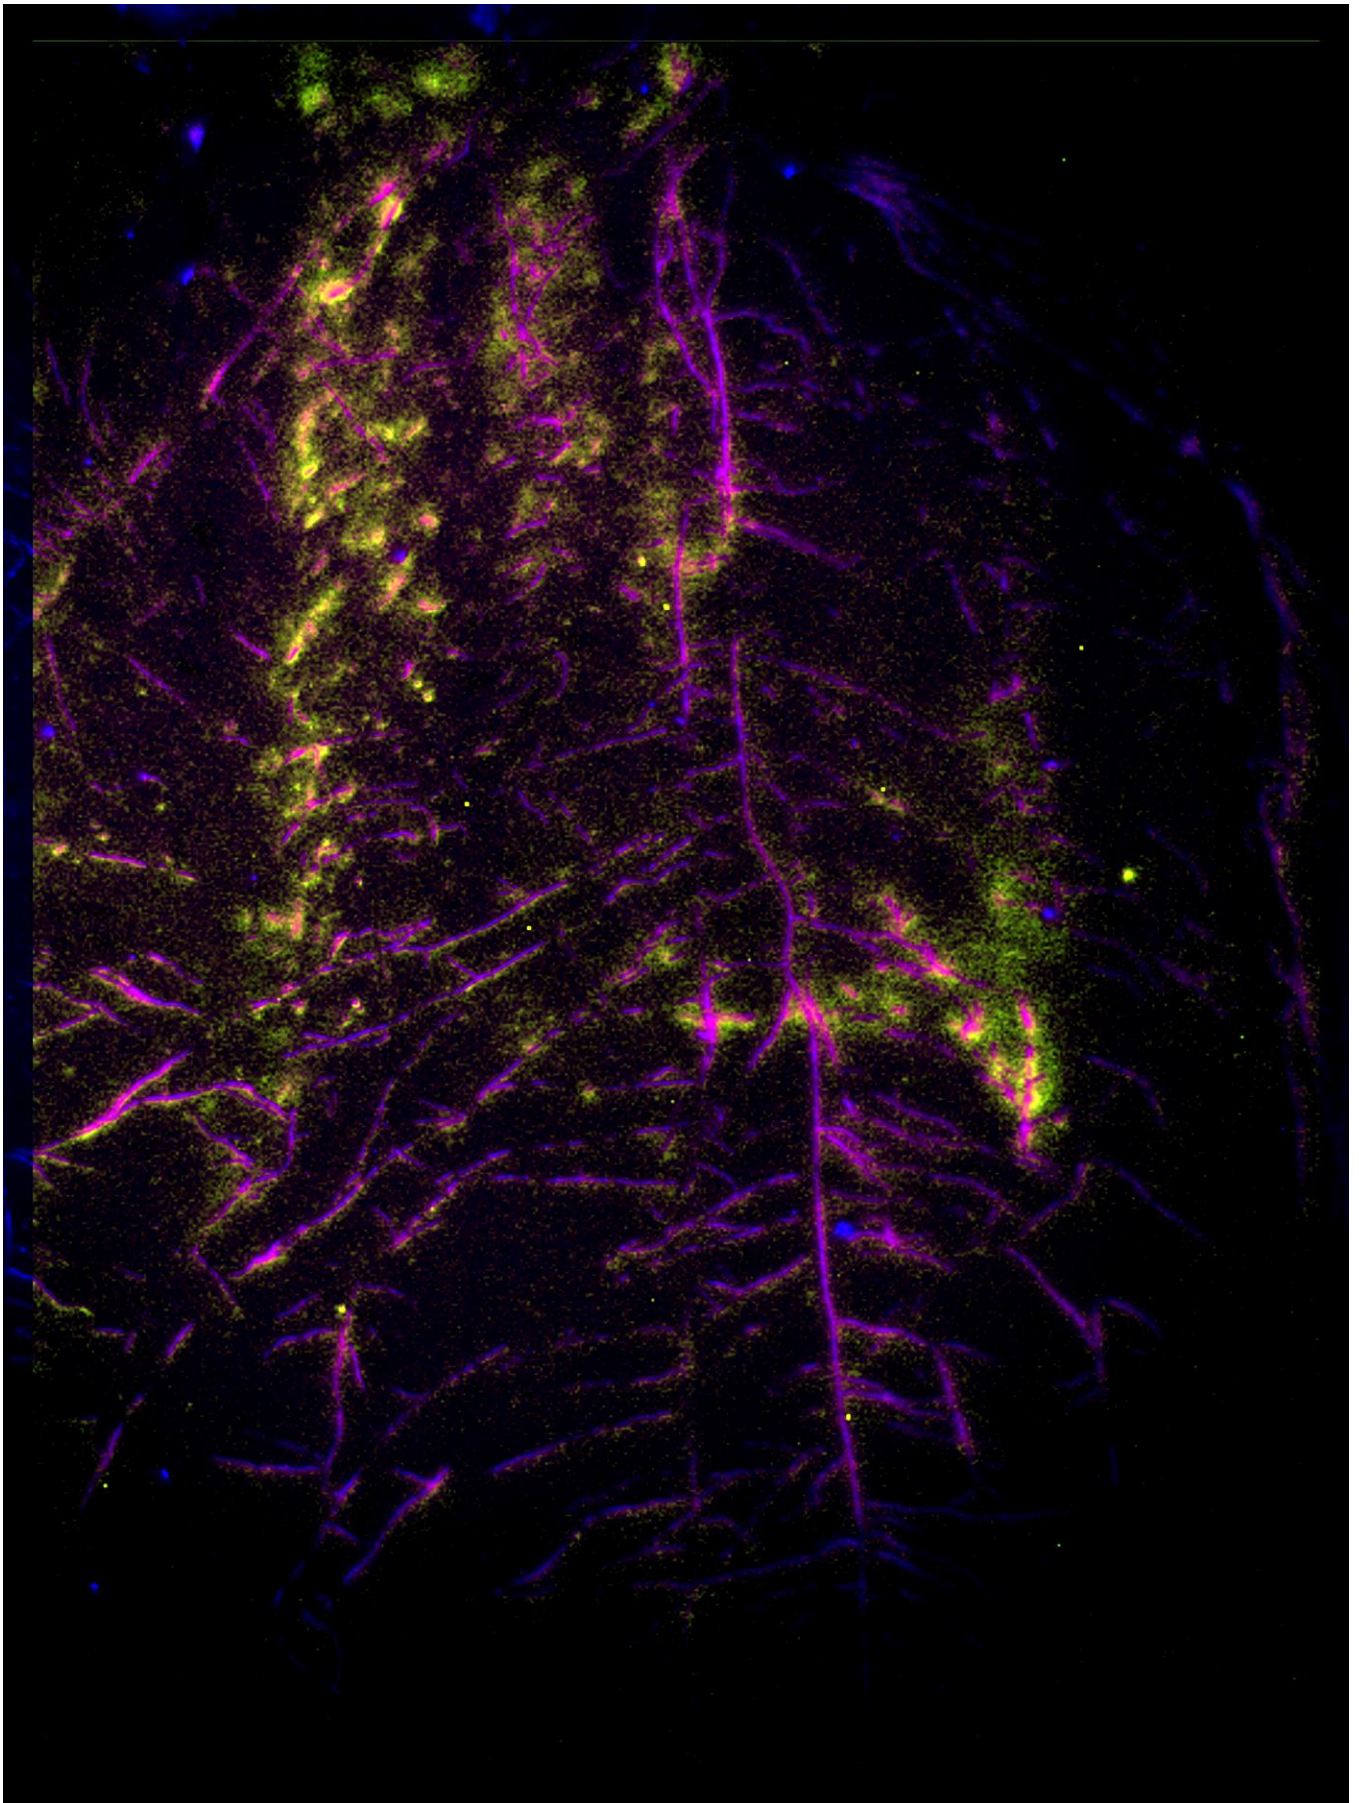

Session\_II  
bacterized 10 weeks

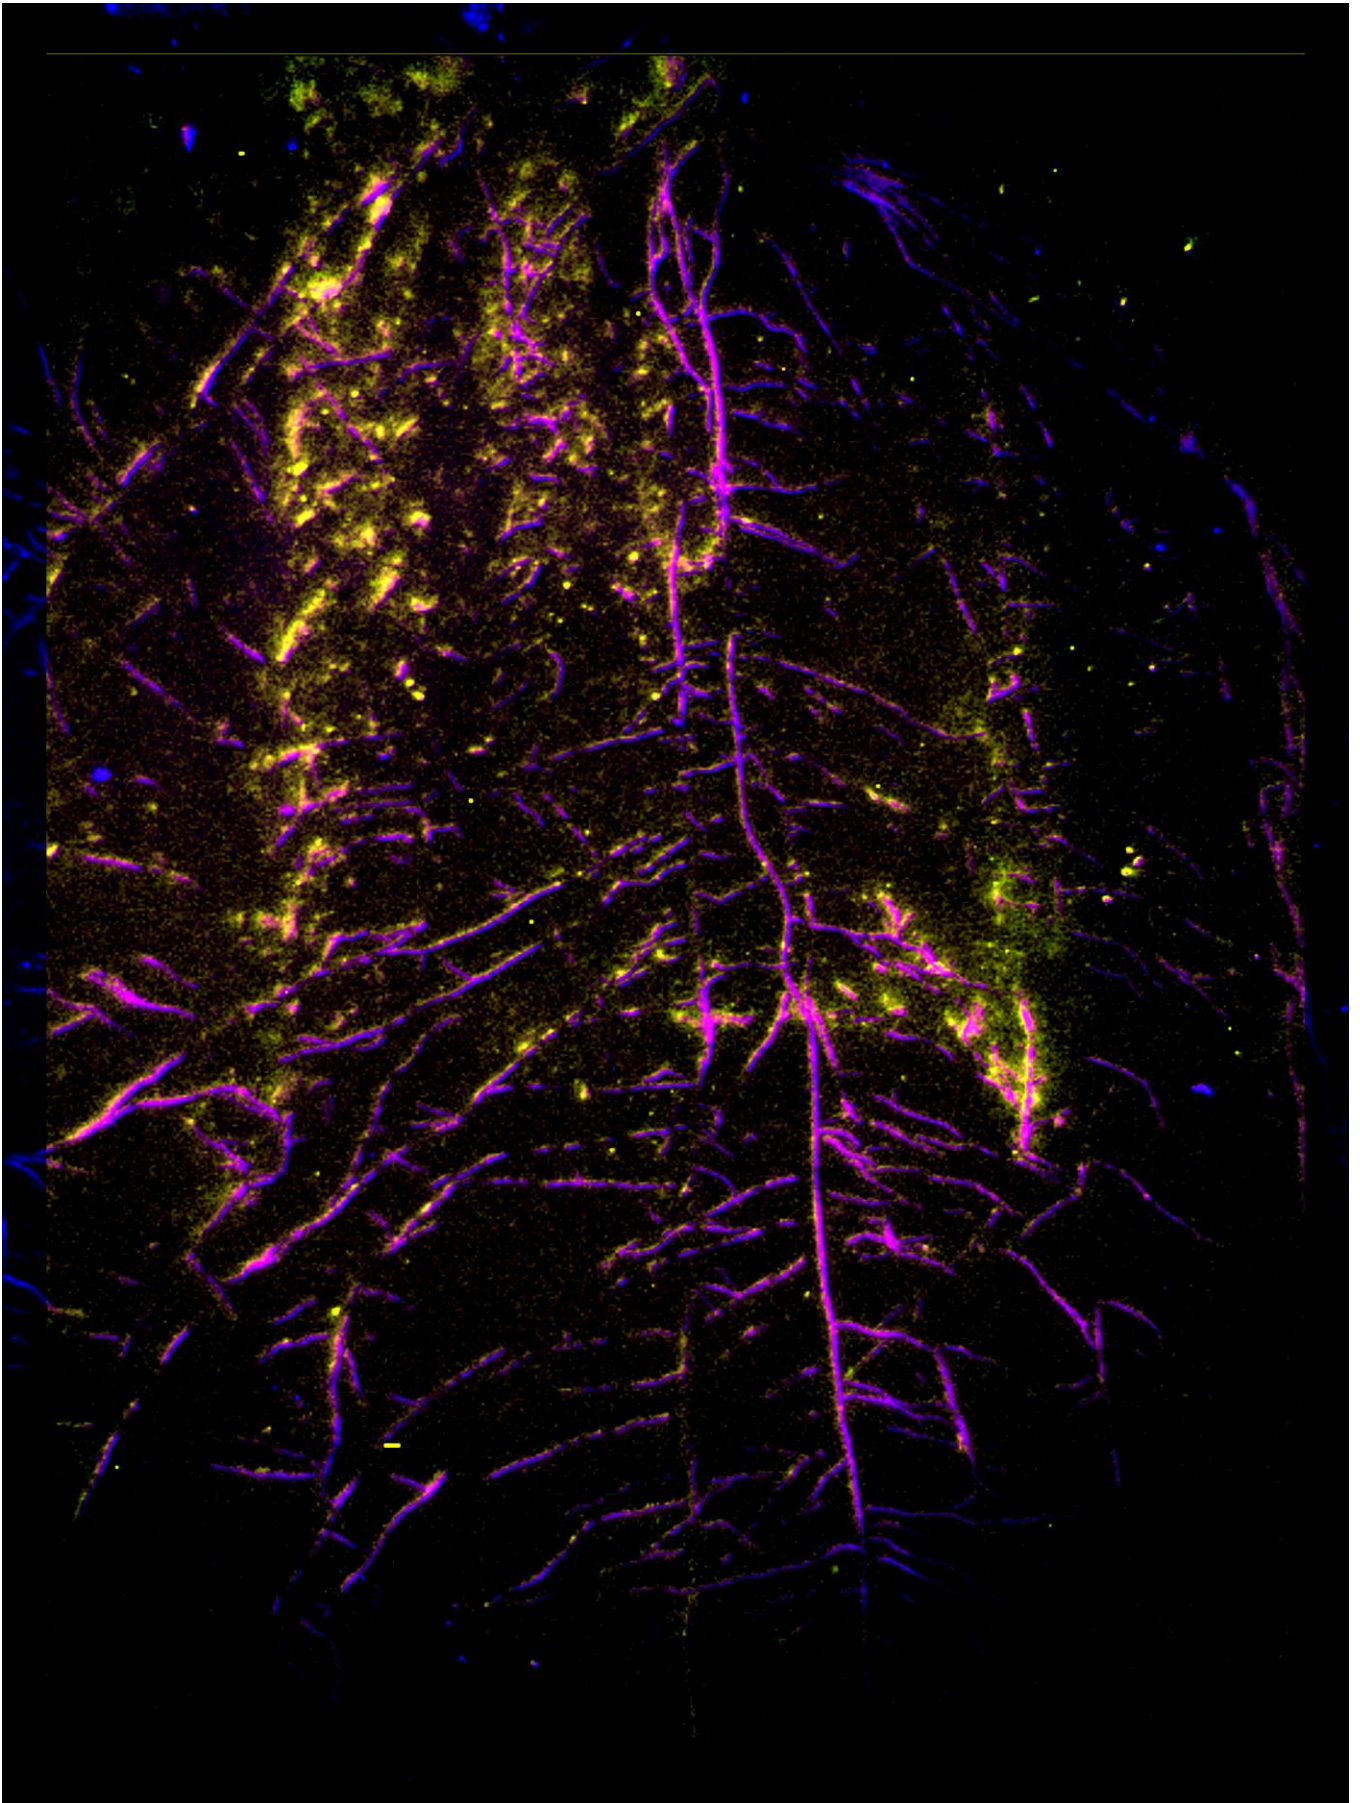

Supplement: Supplementary file 3 [file 88d1bcc34552eb20d0183533.pdf]
