# Supplementary material
Source: Research Square preprint supplement (doi:10.21203/rs.3.rs-9929003/v1)

*shoot-residuals*

*root-residuals*

*Top*

*Left*

*Right*

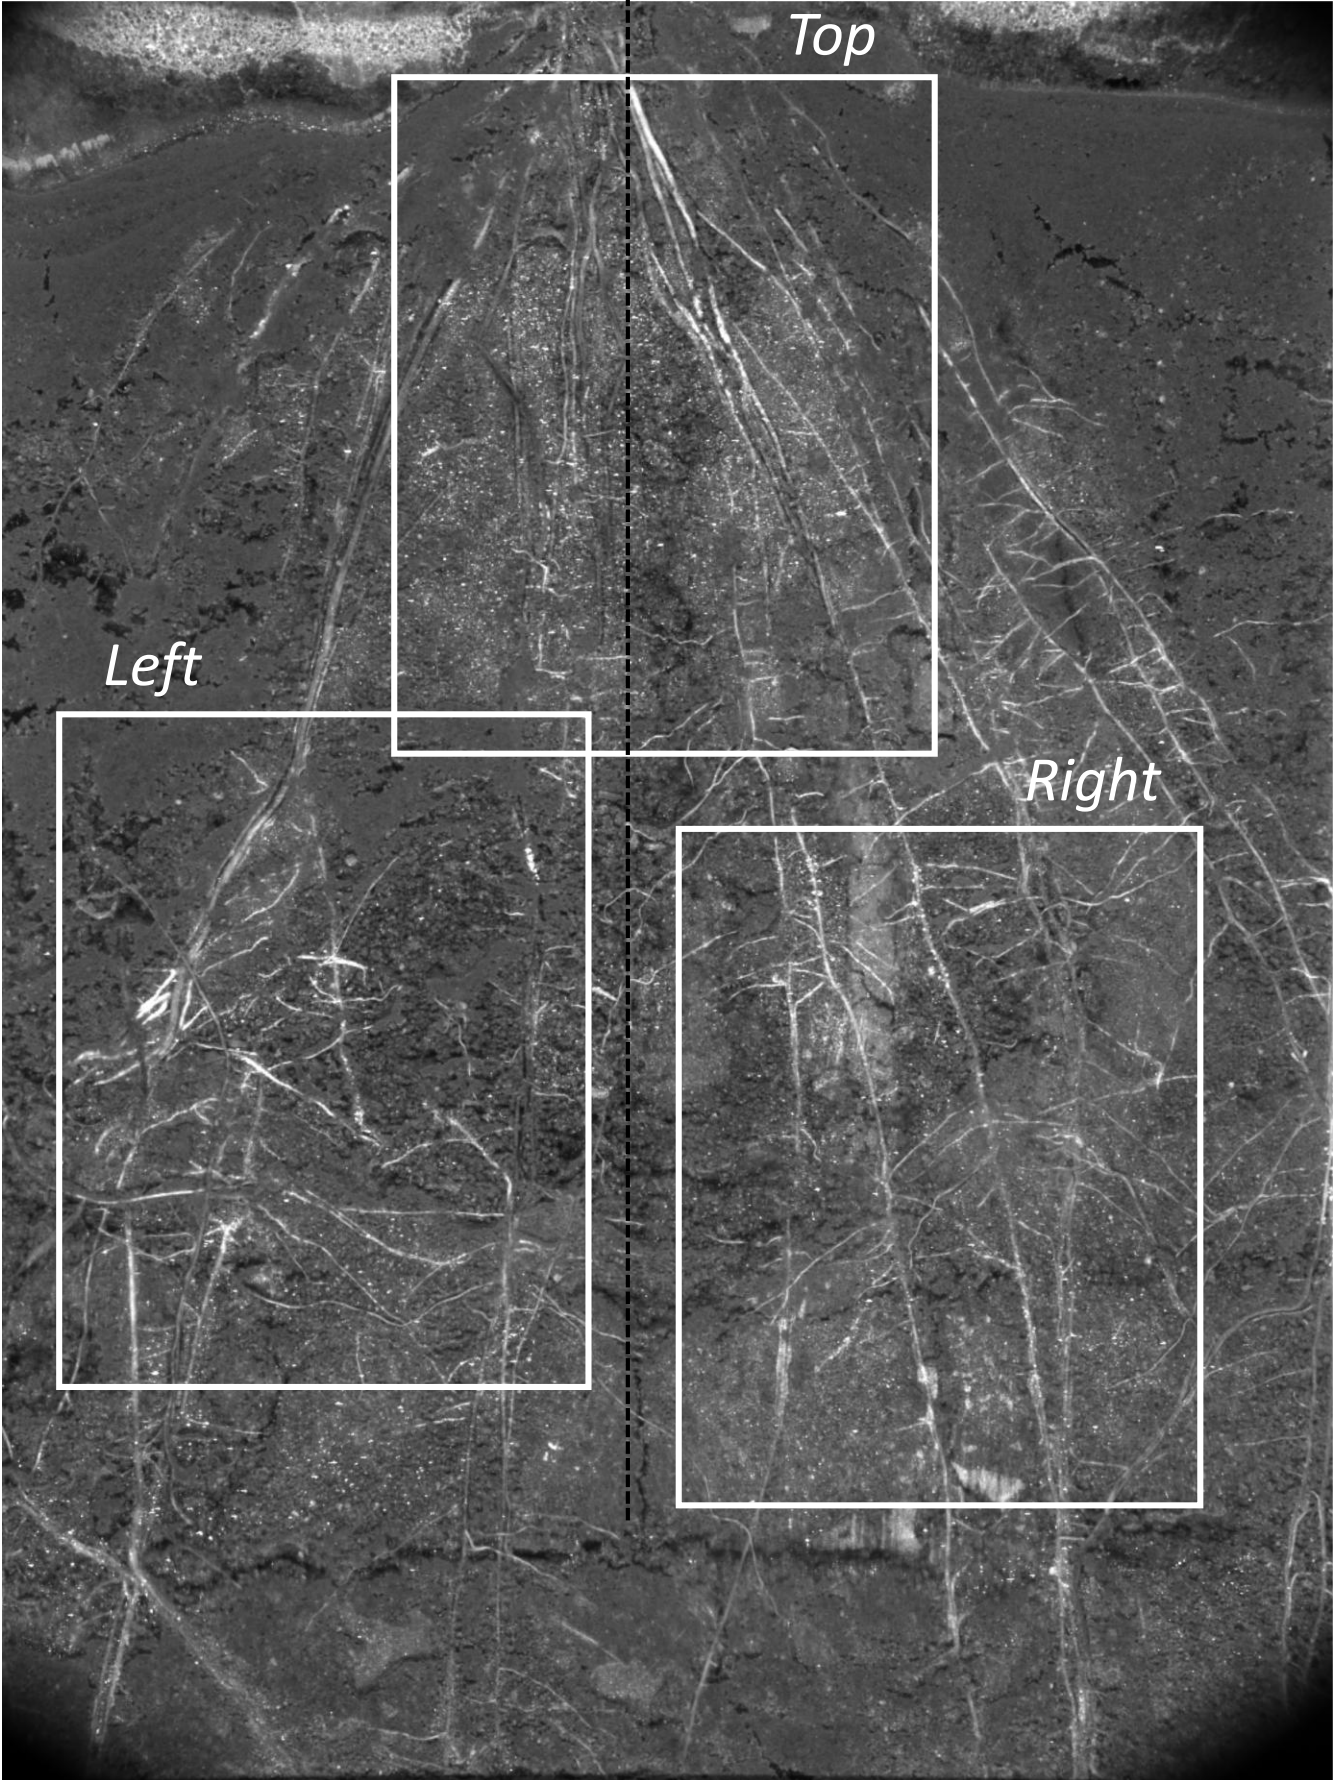

non-bacterized 9 weeks

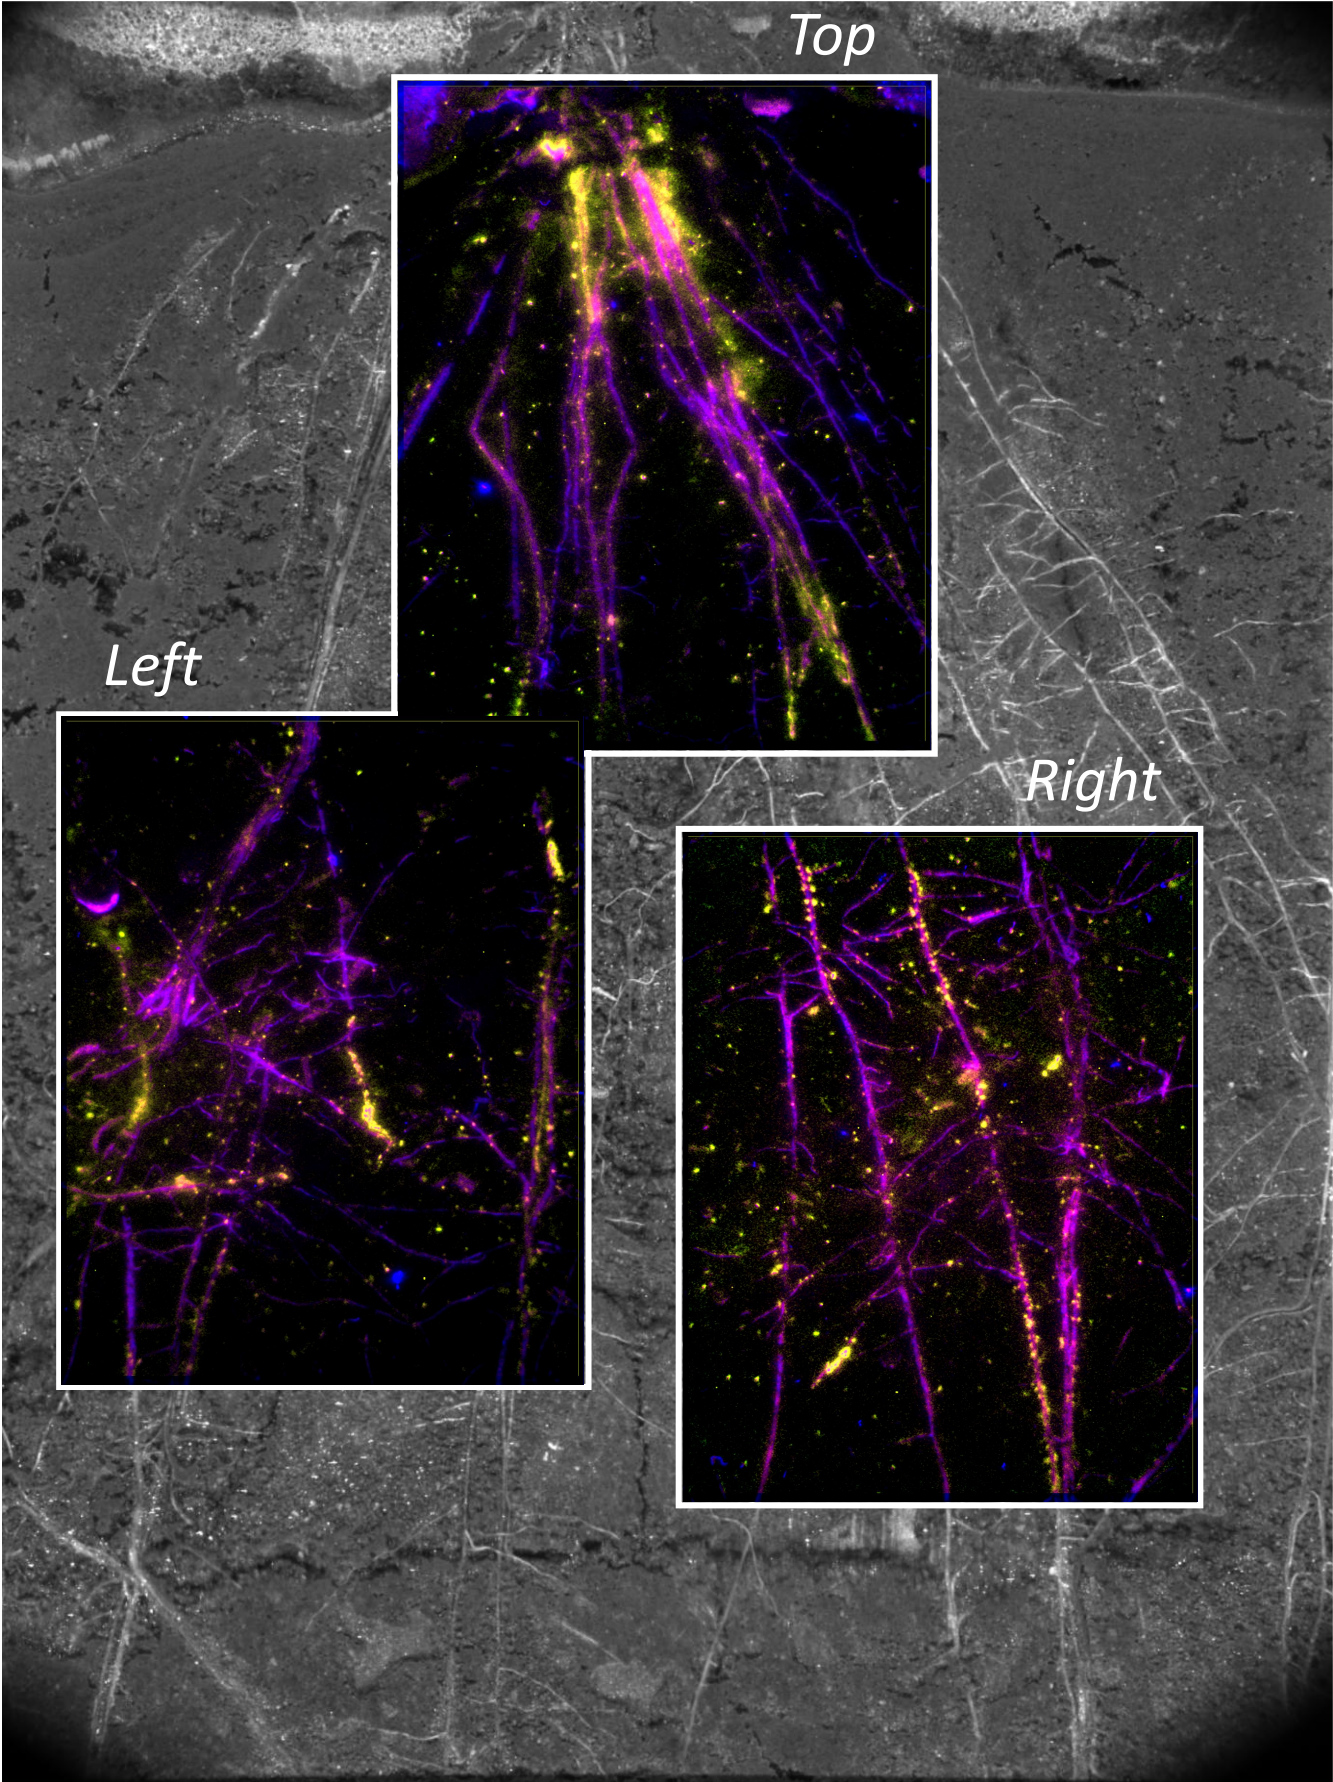

**Non-Bacterized *shoot-residuals***  
**Left**

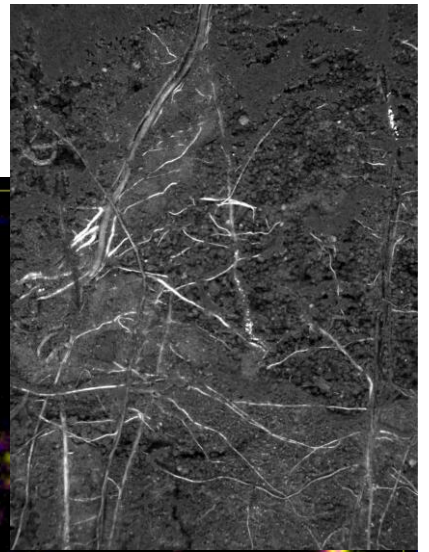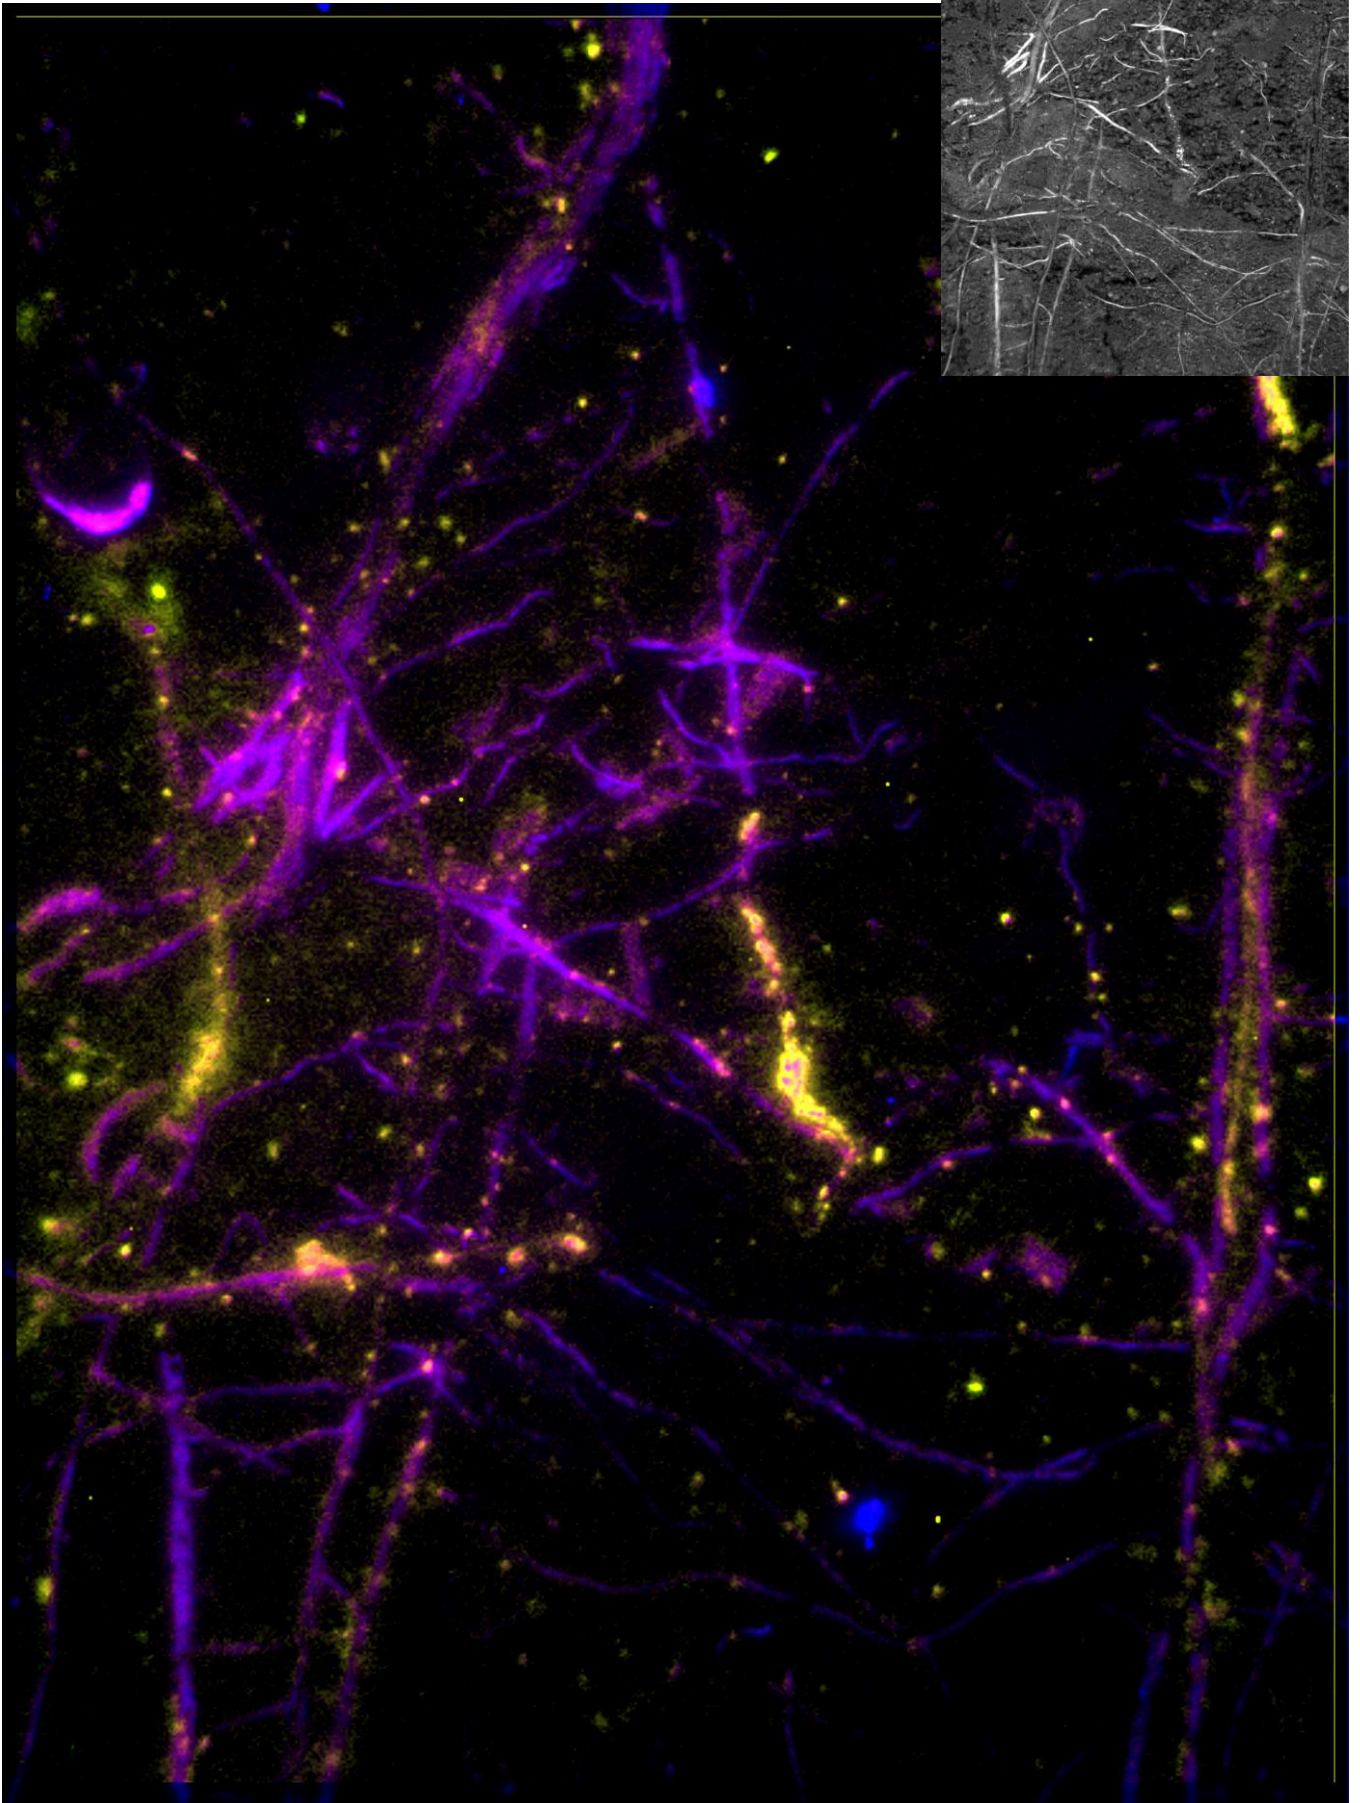

**Non-Bacterized *root-residuals***  
***Right***

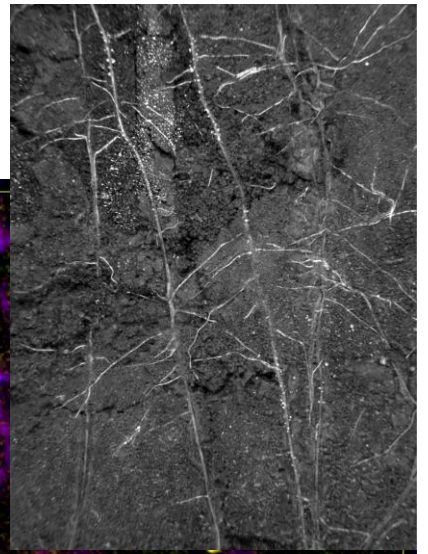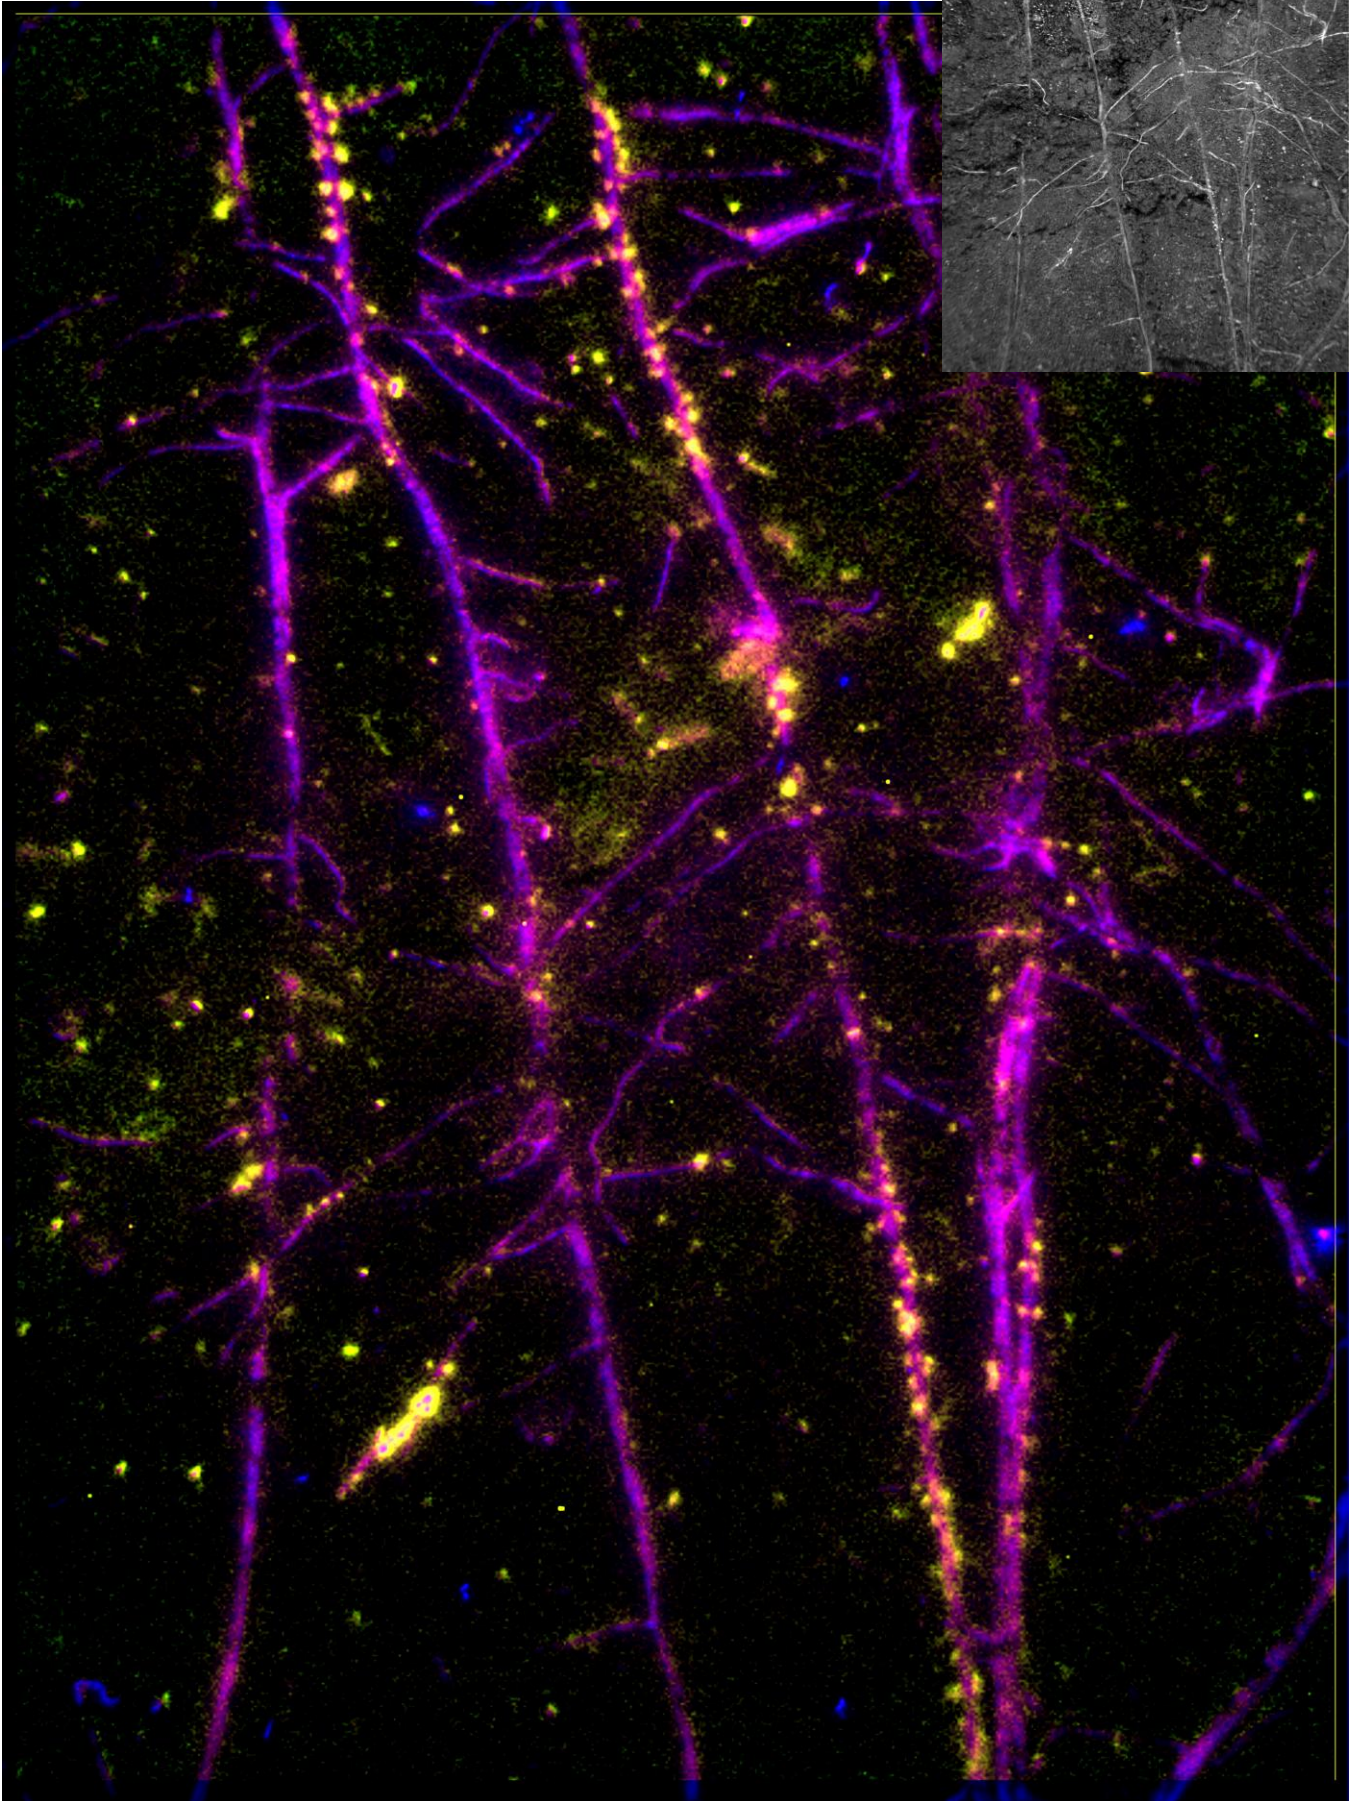

**Non-Bacterized *shoot&root-residuals***  
***Top***

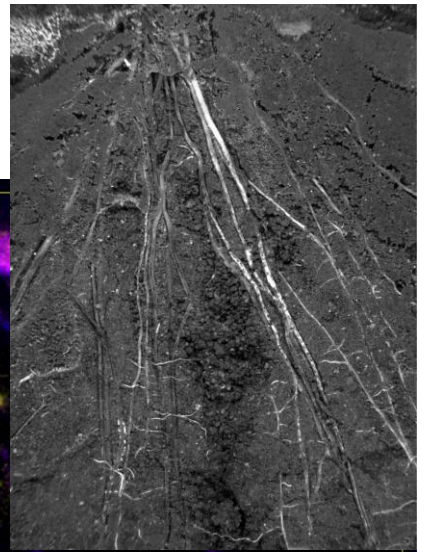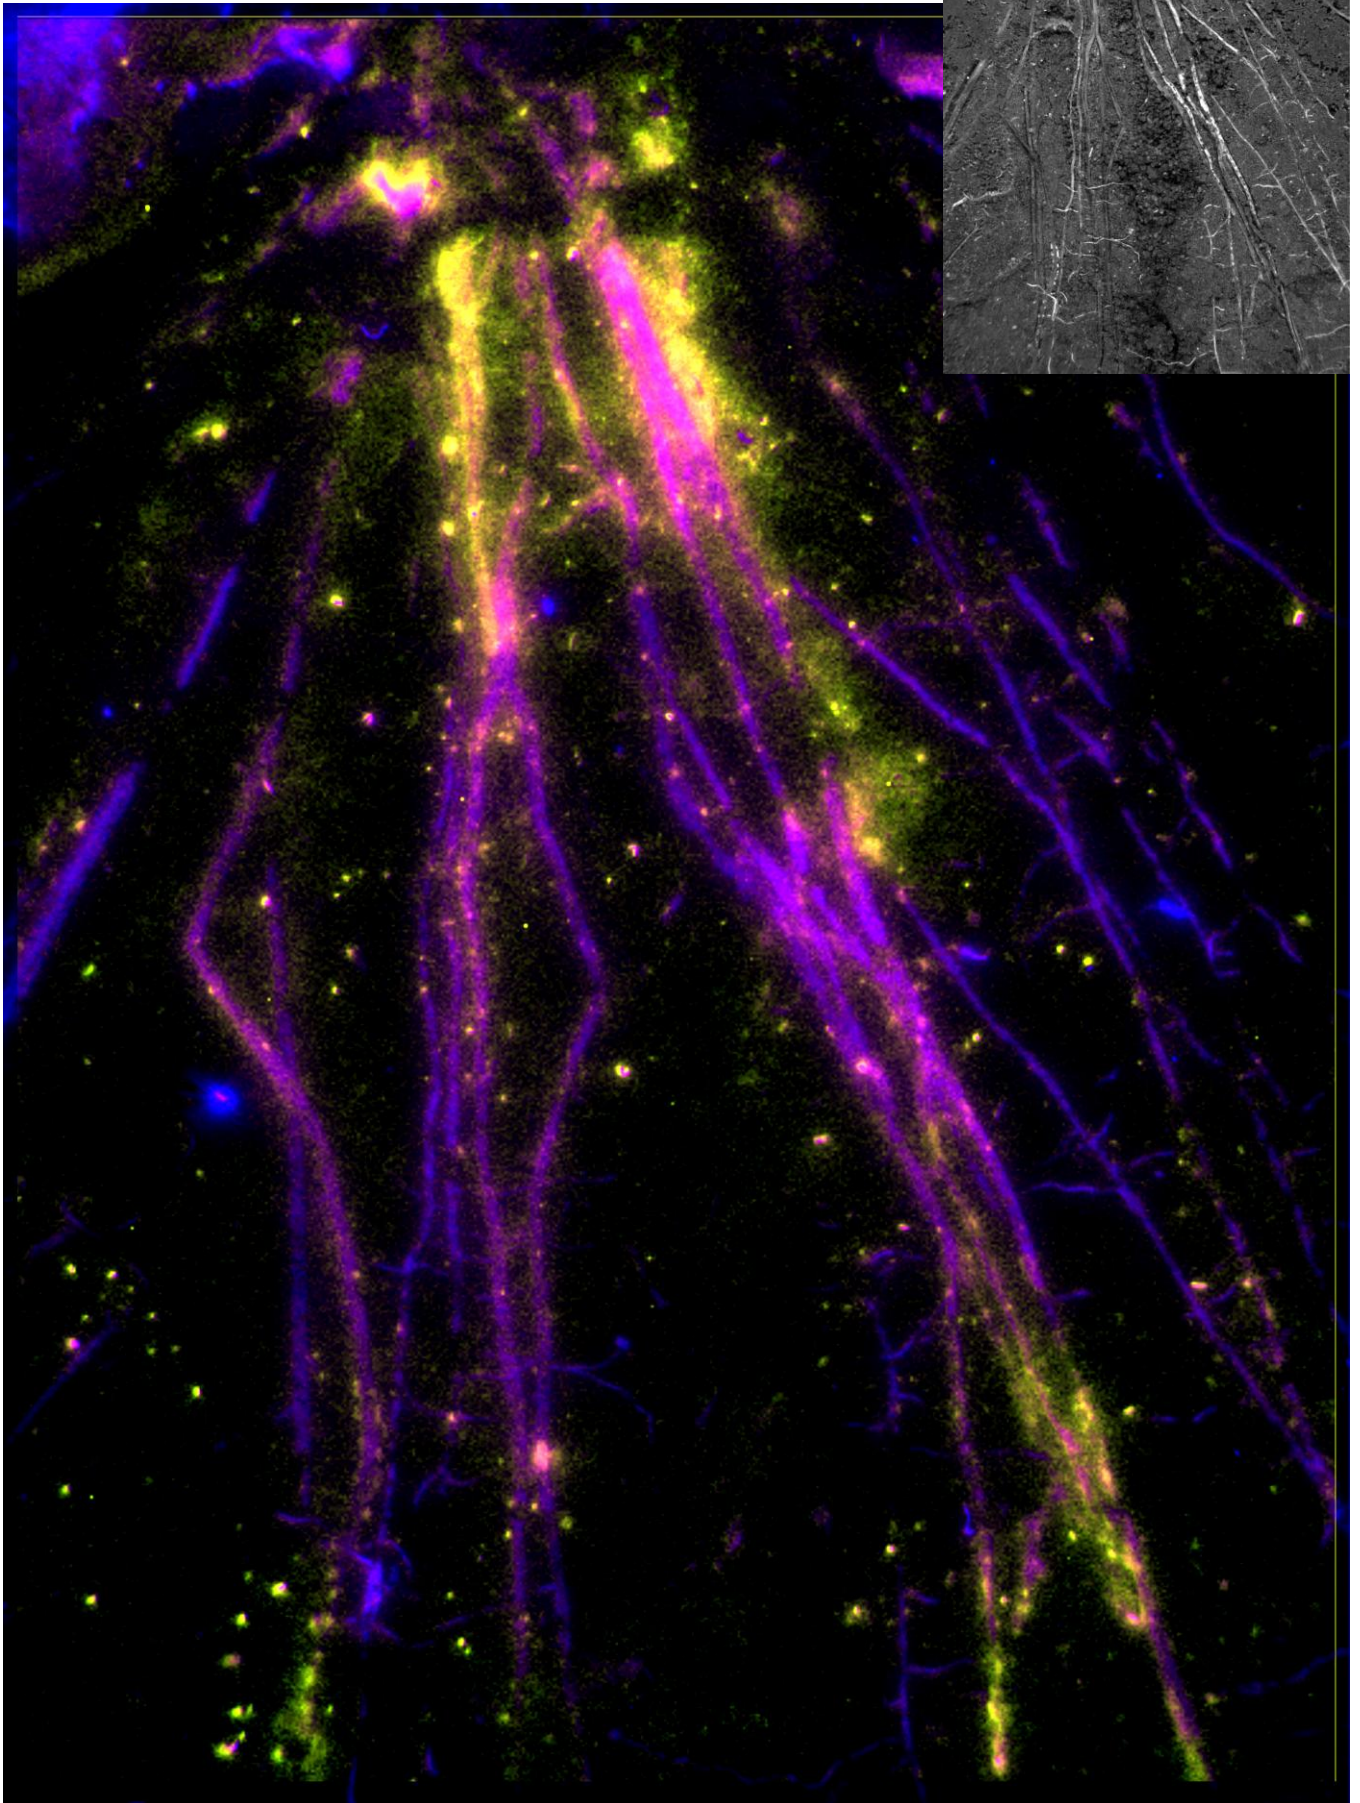

**Session\_II**

non-bacterized 9 weeks

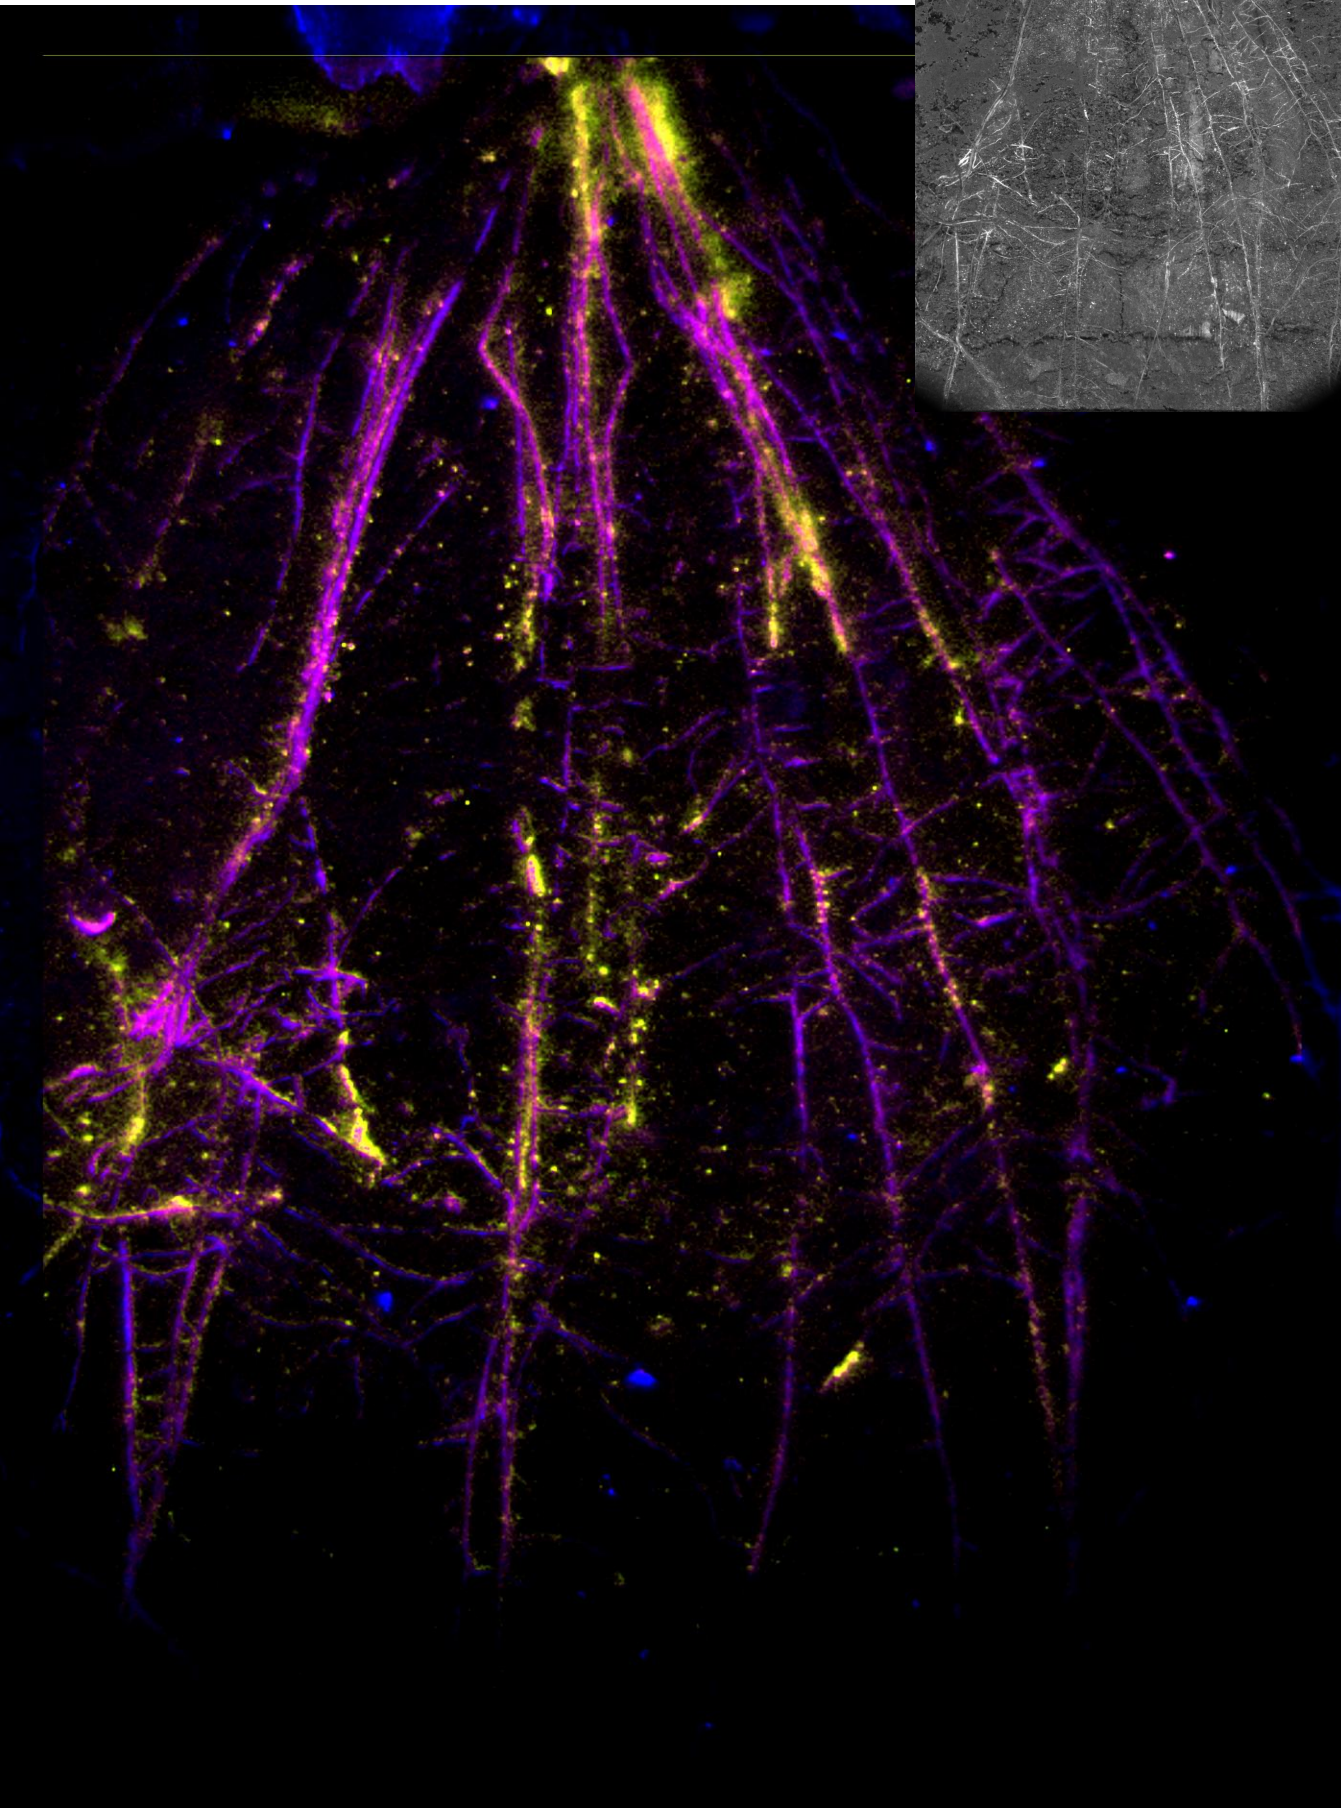

Supplement: Supplementary file 4 [file b3faf8a0b579a867c1727226.pdf]
