# Supplementary material
Source: Research Square preprint supplement (doi:10.21203/rs.3.rs-9929003/v1)

**Session\_I**  
non-bacterized 4 weeks

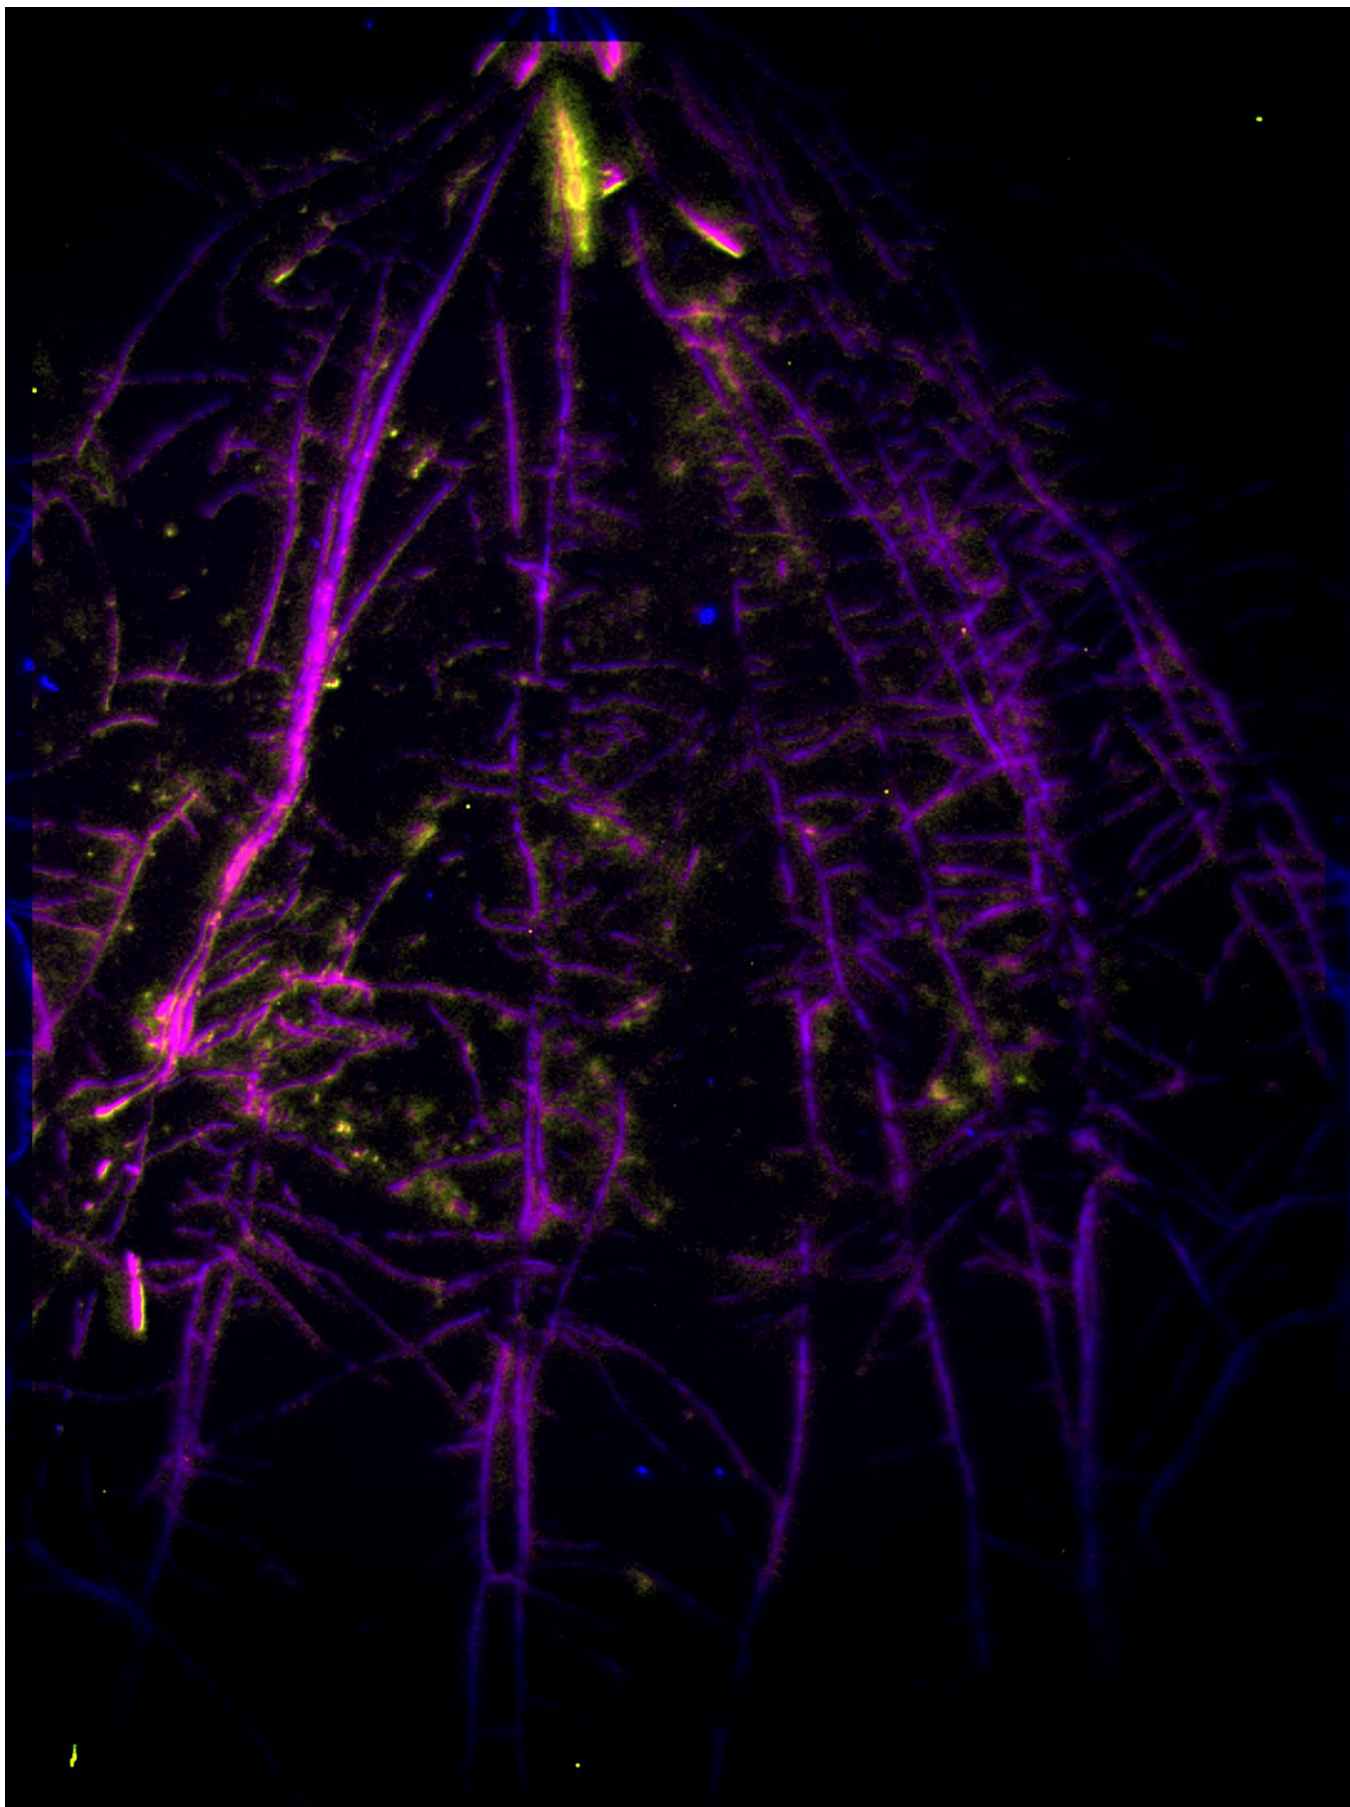

**Session\_II**  
non-bacterized 9 weeks

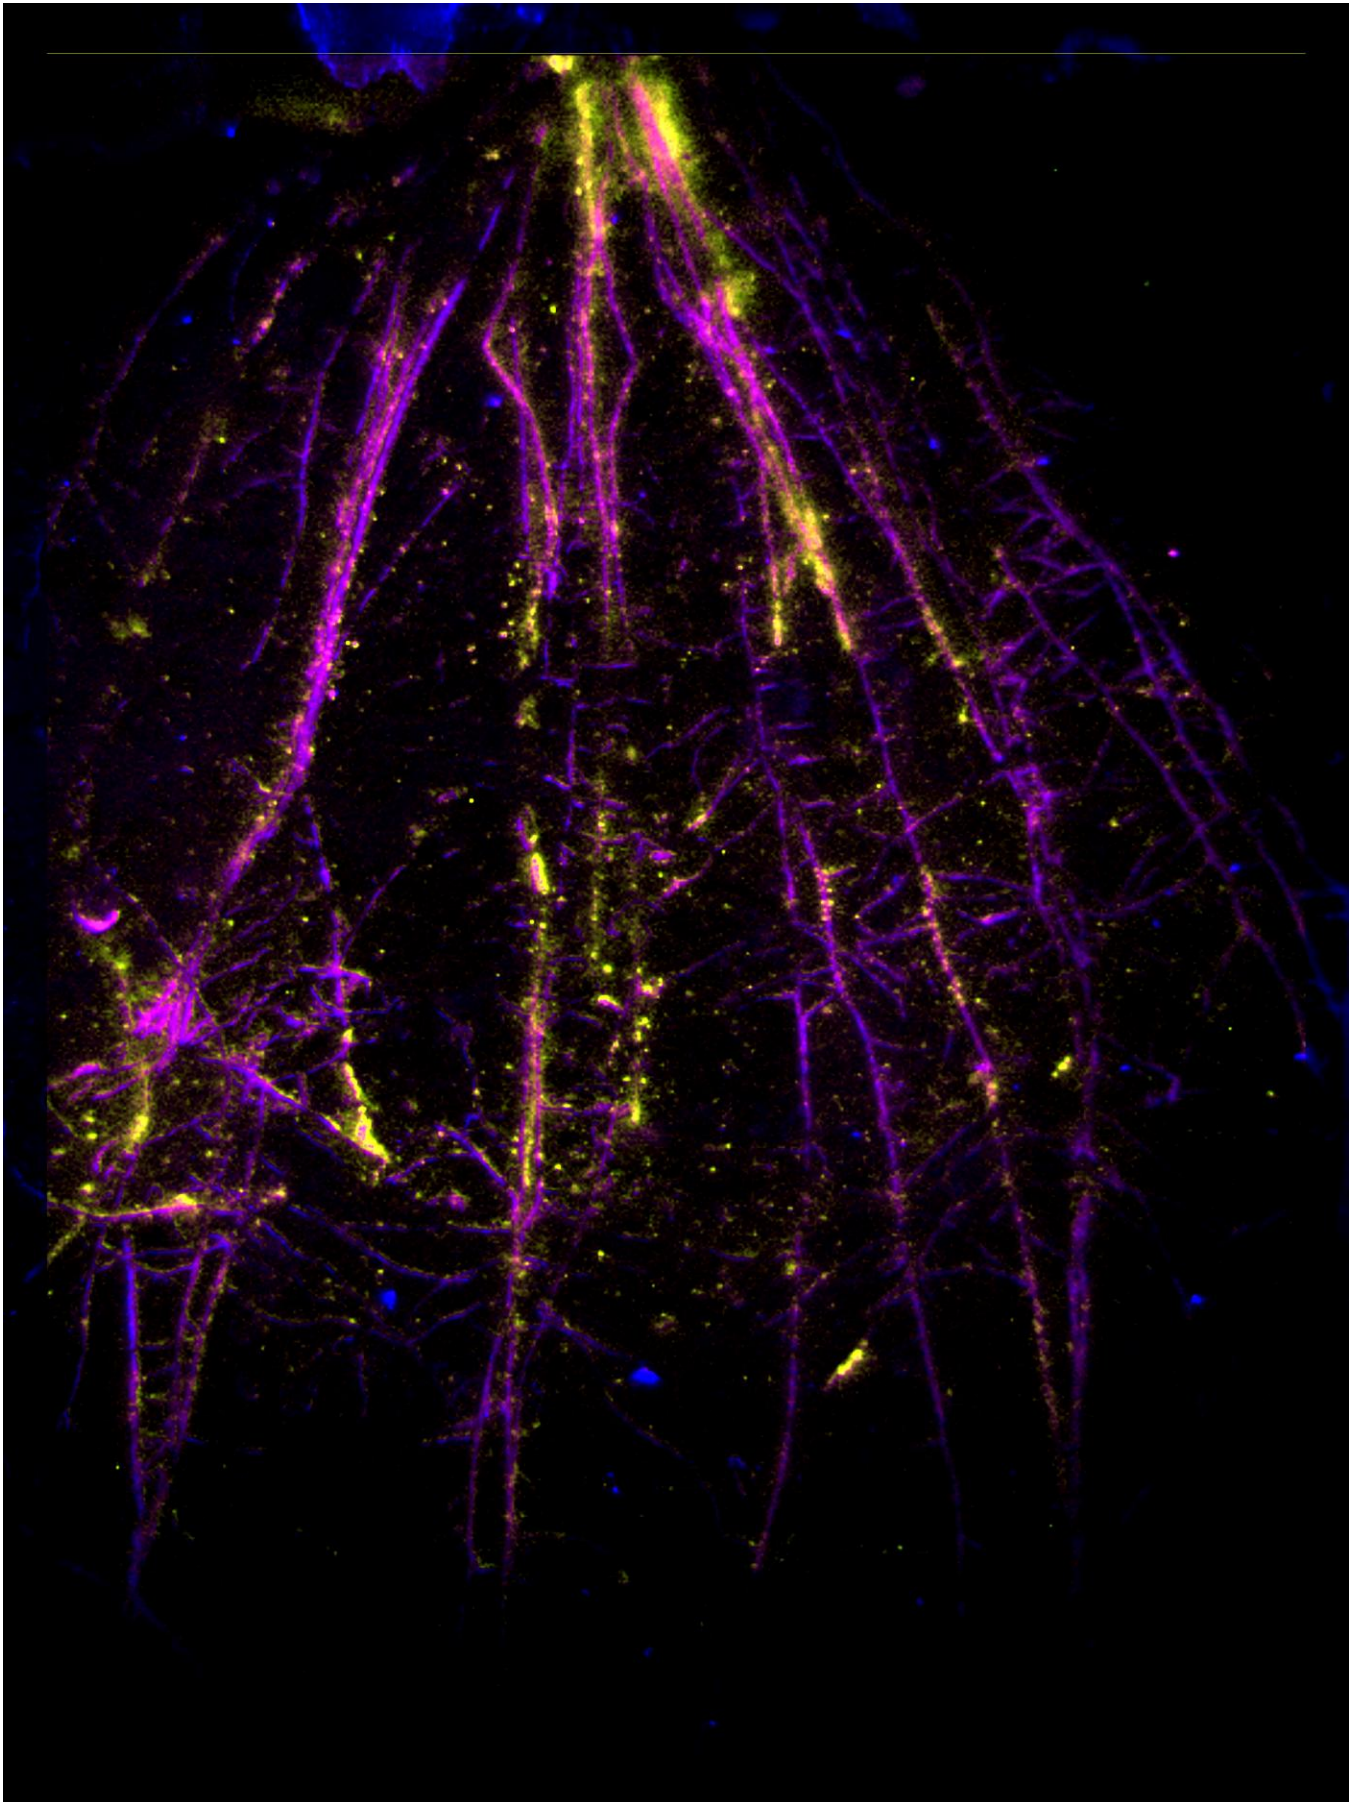

**Session\_II**  
non-bacterized 10 weeks

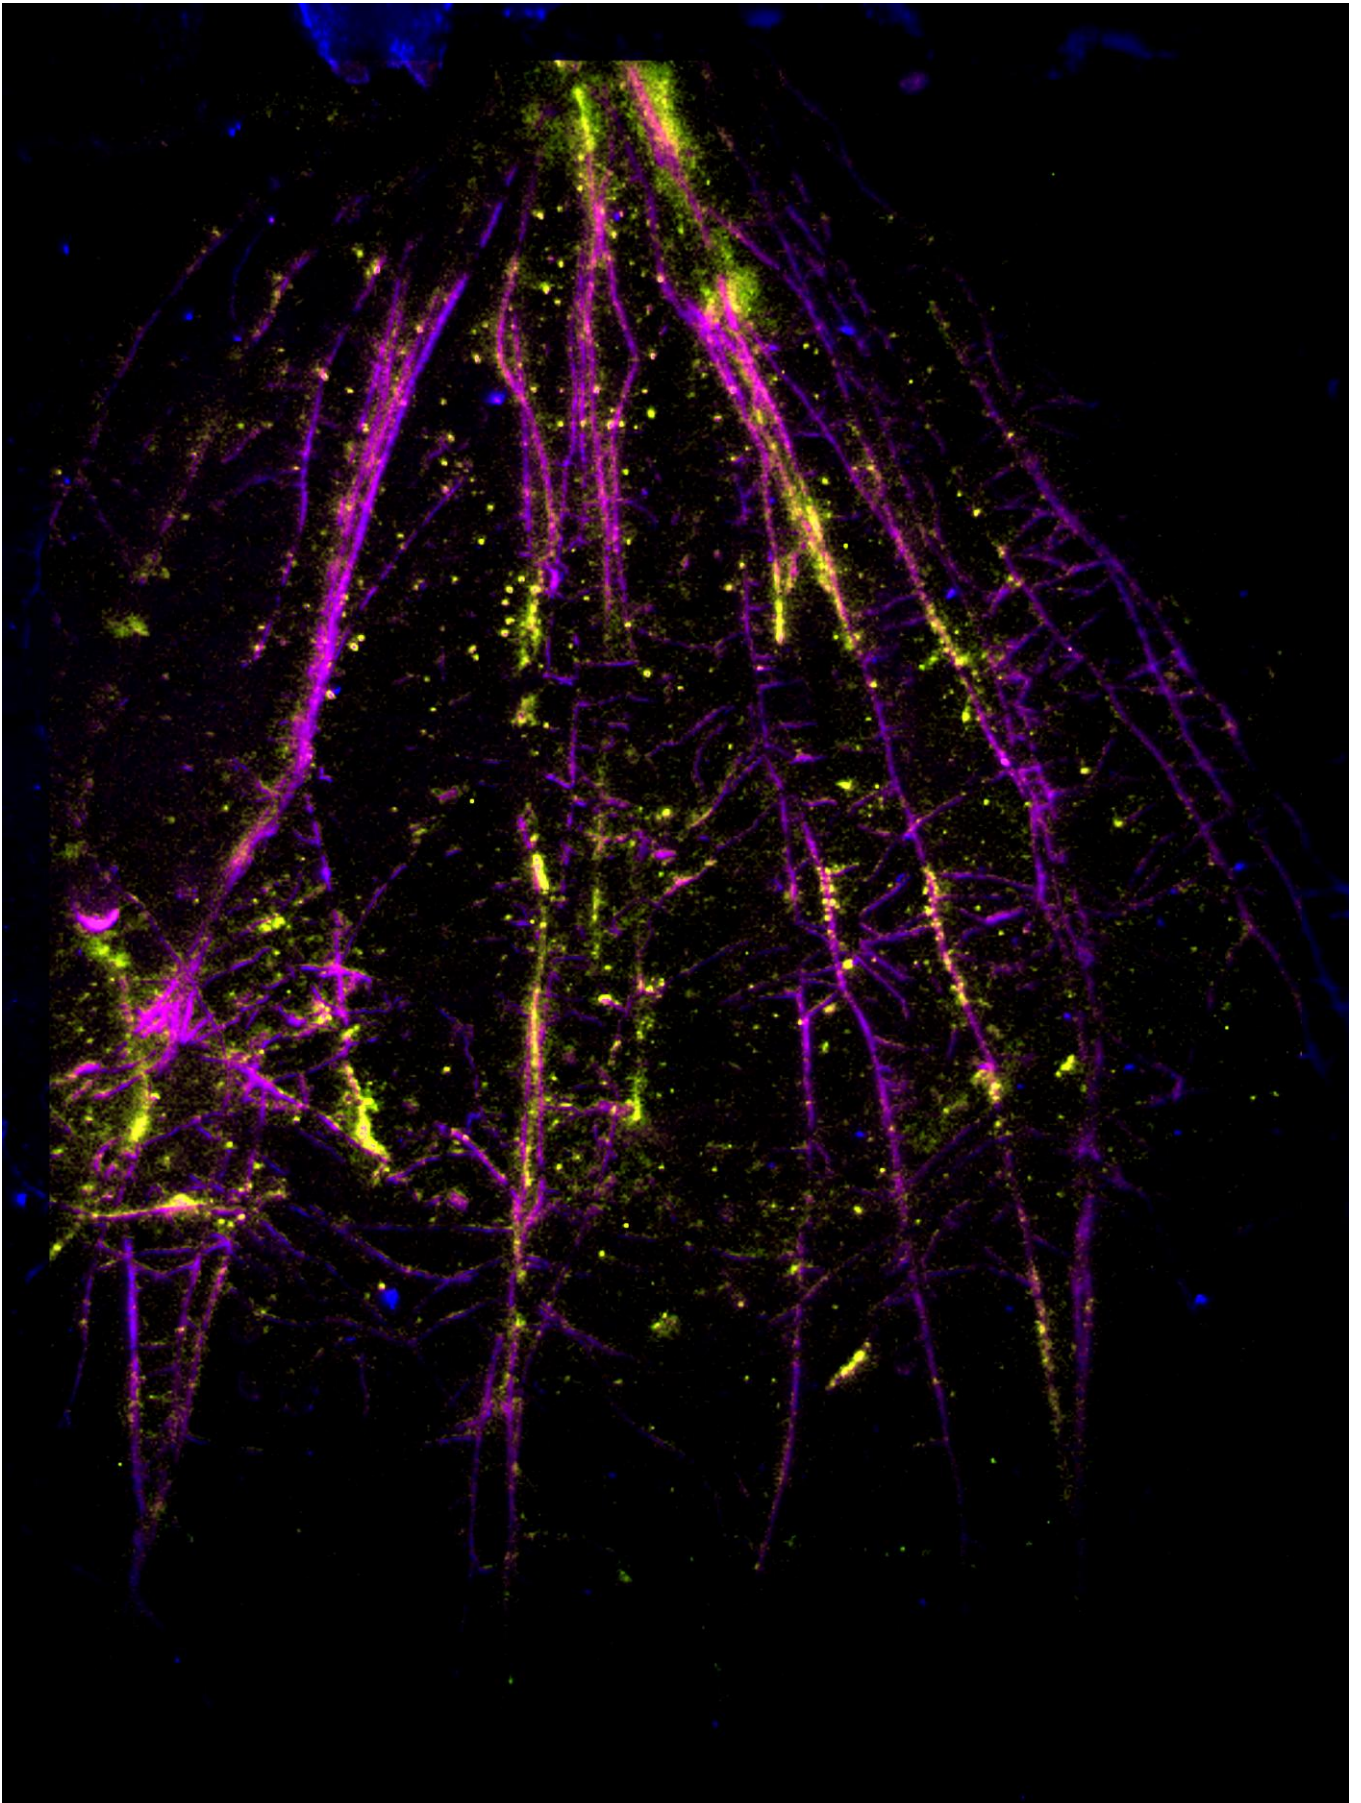

Supplement: Supplementary file 5 [file b5e2e0affaada7910d0de390.pdf]
